# Supplementary material for: Repressing Ago2 mRNA translation by Trim71 maintains pluripotency through inhibiting let-7 microRNAs
Source: eLife. 2021 Feb 18;10:e66288. doi: 10.7554/eLife.66288 (PMC7906602; doi:10.7554/eLife.66288)
Supplement: Supplementary file 1. [file elife-66288-supp1.xlsx]

## Sheet: Trim71
peak	TPM	fold change	annotation
chr1:7169919-7169959:+	26.667	2.917	Pcmtd1:3'UTR
chr1:9731803-9731849:-	5.722	3.637	Vcpip1:intron
chr1:12851523-12851569:+	23.931	8.024	Sulf1:intron
chr1:23764779-23764825:+	16.514	7.11	B3gat2:intron
chr1:26959135-26959187:-	99.847	5.907	intergenic
chr1:34196156-34196183:+	33.458	8.507	Dst:intron
chr1:37005485-37005535:+	2766.54	5.526	intergenic
chr1:38011894-38011942:+	17.292	7.877	Eif5b:intron
chr1:38022163-38022174:+	14.792	6.008	Eif5b:CDS
chr1:46374237-46374289:+	509.931	4.204	intergenic
chr1:54870844-54870888:-	29.722	9.336	Ankrd44:intron
chr1:58582915-58582965:-	12.514	6.71	Fam126b:intron
chr1:59771597-59771641:+	9.931	7.492	Bmpr2:intron
chr1:60231082-60231098:+	5.556	5.431	Nbeal1:intron
chr1:63050687-63050693:-	30.083	6.003	Ino80d:3'UTR
chr1:63303110-63303153:+	9.069	4.422	Zdbf2:CDS
chr1:66560410-66560449:+	12.861	7.45	Unc80:intron
chr1:68197400-68197448:-	52.139	9.299	Erbb4:intron
chr1:72226383-72226402:+	26.806	2.141	intergenic
chr1:77368989-77369025:-	12.708	3.478	Epha4:3'UTR
chr1:82466633-82466683:-	12.958	7.001	Col4a4:intron
chr1:82635041-82635120:+	40.417	4.347	Col4a3:intron
chr1:82767972-82768020:-	32.167	8.602	Tm4sf20:intron
chr1:85069253-85069281:-	48.208	9.186	intergenic
chr1:86356261-86356275:-	85.556	2.798	Snord82:exon_unclassified
chr1:98055152-98055202:-	13.347	7.044	Pam:intron
chr1:106676188-106676234:-	12.708	7.847	Bcl2:intron
chr1:116088008-116088060:+	104.806	9.306	Cntnap5a:intron
chr1:118298536-118298557:-	28.819	8.154	Tsn:3'UTR
chr1:118682438-118682475:+	9.889	3.767	Tfcp2l1:3'UTR
chr1:129613157-129613207:+	17.833	7.114	Thsd7b:CDS
chr1:131931785-131931829:+	35.403	3.419	Nucks1:3'UTR
chr1:133621250-133621255:-	5.25	5.987	Zc3h11a:3'UTR
chr1:135450409-135450460:-	18.931	7.007	Nav1:intron
chr1:136843915-136843963:-	29.597	8.482	Nr5a2:3'UTR
chr1:153220617-153220683:-	15.431	2.143	Lamc1:3'UTR
chr1:161035849-161035911:+	110.806	2.271	Gas5:exon_unclassified
chr1:161036058-161036137:+	86.514	2.343	Gas5:exon_unclassified
chr1:161036733-161036739:+	90.958	2.002	Gas5:exon_unclassified
chr1:161037603-161037662:+	156.583	4.101	Gas5:intron
chr1:162432804-162432851:-	23.542	8.737	Dnm3:intron
chr1:163295518-163295557:-	12.472	8.083	Prrx1:intron
chr1:168221612-168221635:-	32.444	9.2	Pbx1:intron
chr1:168322619-168322657:-	34.514	8.414	Pbx1:intron
chr1:168430110-168430151:-	42.653	8.857	Pbx1:intron
chr1:170358152-170358199:-	13.194	6.58	Nos1ap:intron
chr1:171503056-171503083:-	117.819	2.404	intergenic
chr1:171503109-171503120:-	51.514	1.046	intergenic
chr1:180690393-180690443:+	7.472	7.344	Lin9:3'UTR
chr1:183299370-183299417:+	15.208	8.107	Aida:intron
chr1:191538385-191538397:-	33	5.469	Dtl:3'UTR
chr10:4358745-4358766:+	11.917	2.445	Akap12:3'UTR
chr10:8775253-8775303:-	12.264	7.796	Sash1:intron
chr10:26357976-26358026:+	91.917	5.173	intergenic
chr10:37365047-37365096:+	8.736	7.084	intergenic
chr10:41528824-41528837:+	39.667	4.567	Cd164:CDS
chr10:44326202-44326250:+	109.986	6.458	Atg5:intron
chr10:52860811-52860858:+	20.889	5.449	Slc35f1:intron
chr10:62807223-62807241:-	10.75	2.511	Tet1:3'UTR
chr10:62809528-62809566:-	12.083	2.441	Tet1:3'UTR
chr10:62810376-62810426:-	21.153	2.316	Tet1:3'UTR
chr10:67013496-67013536:-	13.597	3.723	Reep3:3'UTR
chr10:67092437-67092482:-	31.528	8.936	Reep3:intron
chr10:67164094-67164158:+	62.667	6.134	Jmjd1c:intron
chr10:74402028-74402063:+	7.958	7.435	Pcdh15:intron
chr10:77397872-77397916:-	24.444	8.376	Adarb1:intron
chr10:78314228-78314281:+	279.931	6.689	intergenic
chr10:82994020-82994042:+	10.889	4.232	Chst11:intron
chr10:85117493-85117543:+	16.306	7.47	AI597468:3'UTR
chr10:85569337-85569382:+	36.764	8.643	Btbd11:intron
chr10:91031117-91031158:-	29.181	8.172	Apaf1:intron
chr10:94751467-94751517:+	31.264	8.924	Ccdc41:intron
chr10:102078420-102078464:+	23.514	8.32	Mgat4c:intron
chr10:111985322-111985350:+	22.667	4.385	Krr1:3'UTR
chr10:116420574-116420624:-	28.625	7.903	Kcnmb4:intron
chr10:121587480-121587496:-	20.486	8.314	Xpot:3'UTR
chr10:122985697-122985719:-	19.889	4.555	Mirlet7i:exon_unclassified
chr10:128084017-128084059:+	27.472	5.053	Atp5b:CDS
chr10:128084156-128084193:+	54.986	2.779	Atp5b:intron
chr10:128085313-128085359:+	30.389	4.808	Atp5b:exon_unclassified
chr11:20021658-20021703:+	17.583	5.377	Spred2:3'UTR
chr11:20062895-20062937:-	30.889	4.167	Actr2:3'UTR
chr11:20215549-20215589:+	10.569	6.997	Rab1:intron
chr11:23290244-23290295:+	26.347	8.899	Xpo1:intron
chr11:29220353-29220400:+	24.931	8.82	Smek2:3'UTR
chr11:29451002-29451038:+	26.736	8.698	Ccdc88a:CDS
chr11:29742299-29742330:+	28.153	3.018	Rtn4:3'UTR
chr11:29742377-29742414:+	31.667	2.212	Rtn4:3'UTR
chr11:32746578-32746621:+	11.181	4.27	Fbxw11:3'UTR
chr11:43436357-43436407:+	24.375	6.787	Slu7:5'UTR
chr11:47941595-47941636:-	29.486	8.647	Sgcd:intron
chr11:48802044-48802084:+	37.097	3.371	Snord96a:5'UTR
chr11:50200183-50200217:-	26.097	3.6	Sqstm1:3'UTR
chr11:50884173-50884196:-	10.778	4.172	Zfp454:intron
chr11:51302254-51302298:+	13.389	7.048	Col23a1:intron
chr11:57764513-57764547:+	33.736	6.286	Galnt10:intron
chr11:62340580-62340619:-	32.986	8.349	Ncor1:CDS
chr11:62603100-62603150:+	65.125	1.119	2410006H16Rik:exon_unclassified
chr11:62603449-62603521:+	516.569	2.077	2410006H16Rik:intron
chr11:62604463-62604508:+	29.875	3.683	2410006H16Rik:exon_unclassified
chr11:62604520-62604536:+	47.306	2.941	2410006H16Rik:exon_unclassified
chr11:62895033-62895045:+	8.361	2.282	Fam18b:3'UTR
chr11:66300597-66300643:+	6.861	6.543	intergenic
chr11:74319859-74319911:+	840.5	4.997	intergenic
chr11:74666037-74666069:+	31.875	8.952	1300001I01Rik:CDS
chr11:75326733-75326735:-	13.722	7.958	Rpa1:intron
chr11:75509152-75509165:+	27.861	6.317	Prpf8:CDS
chr11:75594347-75594397:+	19.458	8.462	Pitpna:intron
chr11:77691974-77692016:+	22.667	4.609	Nufip2:CDS
chr11:77716651-77716701:+	32.222	5.236	Nufip2:3'UTR
chr11:78181686-78181753:-	27	2.969	Snord4a:exon_unclassified
chr11:79427412-79427442:+	6.708	7.189	Nf1:intron
chr11:80013531-80013583:+	75.194	5.579	Suz12:CDS
chr11:80033281-80033328:+	20.514	2.701	Suz12:3'UTR
chr11:80033384-80033465:+	54.097	5.689	Suz12:3'UTR
chr11:81604526-81604581:-	25.833	9.134	Accn1:intron
chr11:84444414-84444464:-	6.944	6.976	Aatf:intron
chr11:85719847-85719898:+	42.931	8.867	Bcas3:intron
chr11:88455380-88455405:-	5.403	6.198	Msi2:intron
chr11:95281519-95281547:-	6.722	5.929	Myst2:CDS
chr11:96953896-96953932:-	30.944	5.909	Sp2:3'UTR
chr11:97206835-97206885:-	26.278	2.583	Npepps:3'UTR
chr11:97715246-97715261:-	5.583	3.117	Pip4k2b:3'UTR
chr11:97781642-97781692:-	32.681	3.03	Rpl23:exon_unclassified
chr11:98224541-98224585:+	14.403	7.806	Cdk12:CDS||3'UTR
chr11:99424476-99424526:+	32.139	7.523	intergenic
chr11:103889170-103889217:-	14.972	8.084	Nsf:intron
chr11:104615407-104615449:+	27.681	7.855	Itgb3:intron
chr11:107188457-107188494:-	33.472	5.923	Nol11:intron
chr11:110310434-110310481:-	19.569	7.47	Abca5:intron
chr11:113689055-113689106:+	5.292	6.583	D11Wsu47e:CDS
chr11:116326623-116326673:-	4.708	5.093	intergenic
chr11:120961795-120961819:-	10.431	4.624	Csnk1d:3'UTR
chr12:4977484-4977532:+	45.958	6.506	Atad2b:intron
chr12:8751654-8751686:+	4.806	4.386	Pum2:3'UTR
chr12:36816247-36816268:+	66.597	1.632	intergenic
chr12:53046731-53046785:-	354.639	5.083	intergenic
chr12:54666694-54666738:-	21.444	4.602	intergenic
chr12:67489127-67489178:-	468.153	5.165	intergenic
chr12:70466264-70466267:+	8.208	2.294	Mir4660:3'UTR
chr12:80167611-80167640:-	8.847	3.91	Actn1:3'UTR
chr12:82150504-82150553:+	11.472	4.056	intergenic
chr12:82631627-82631673:+	18.472	8.65	Rgs6:intron
chr12:82948027-82948077:+	19.181	8.704	Rgs6:intron
chr12:85718498-85718547:-	2174.85	5.826	intergenic
chr12:89785578-89785629:+	9.556	7.436	Nrxn3:intron
chr12:90801654-90801715:+	144.347	5.298	intergenic
chr12:98701696-98701719:-	6.417	6.862	Ptpn21:intron
chr12:104746620-104746667:-	15.597	7.728	Dicer1:intron
chr12:108816086-108816137:+	22.694	3.468	Yy1:3'UTR
chr12:110651595-110651645:+	41.014	8.216	Dync1h1:CDS
chr12:111539284-111539319:+	4.222	6.035	Eif5:5'UTR
chr12:112624792-112624842:+	36.694	9.377	Adssl1:intron
chr13:3548874-3548914:+	29.111	6.271	Gdi2:CDS
chr13:11923180-11923230:-	20.944	7.346	Ryr2:intron
chr13:14118742-14118767:-	84.5	4.5	intergenic
chr13:29605224-29605258:-	6.389	3.826	Cdkal1:intron
chr13:55319902-55319928:-	21.569	8.611	Rab24:3'UTR
chr13:55699956-55699982:+	14.389	7.027	B230219D22Rik:3'UTR
chr13:55703322-55703364:+	34.583	4.247	B230219D22Rik:3'UTR
chr13:58984271-58984321:+	19.611	8.473	Ntrk2:intron
chr13:68670537-68670583:-	18.764	7.825	Adcy2:intron
chr13:73693069-73693119:-	28.861	7.915	Slc6a19:CDS
chr13:76094684-76094734:-	26.597	7.913	Arsk:intron
chr13:89984664-89984706:-	27.208	8.946	Xrcc4:intron
chr13:94098715-94098765:+	30.514	8.889	Lhfpl2:intron
chr13:95605533-95605580:-	17.25	7.703	F2r:intron
chr13:96650149-96650210:-	13	4.88	Hmgcr:3'UTR
chr13:98839144-98839149:-	13.833	4.047	intergenic
chr13:98842909-98842949:-	27.958	3.651	Tnpo1:3'UTR
chr13:100779624-100779674:-	27.514	4.932	Ccnb1:3'UTR
chr13:119707354-119707393:+	8.694	3.735	Hmgcs1:3'UTR
chr14:17761575-17761614:+	7.722	7.392	Thrb:intron
chr14:19418821-19418871:-	23.542	8.514	intergenic
chr14:21328440-21328490:+	27.25	7.533	Adk:intron
chr14:21855606-21855651:+	29.389	8.182	intergenic
chr14:22271471-22271528:+	13.375	7.699	1700112E06Rik:intron
chr14:22396138-22396141:+	35.958	8.233	1700112E06Rik:intron
chr14:22396154-22396182:+	6.792	6.944	1700112E06Rik:intron
chr14:30480268-30480289:+	7.444	7.339	Dcp1a:intron
chr14:31014310-31014355:-	26.444	1.485	Snord69:exon_unclassified
chr14:34411282-34411332:-	14.792	3.629	Bmpr1a:3'UTR
chr14:34685134-34685163:+	26.833	4.69	Wapal:intron
chr14:47531814-47531864:+	6.653	3.251	Fbxo34:3'UTR
chr14:56753828-56753842:-	18.125	8.623	Pspc1:intron
chr14:60153816-60153861:-	7.417	7.071	Atp8a2:intron
chr14:62946675-62946714:+	13.333	6.18	Wdfy2:intron
chr14:76507311-76507315:+	120.819	3.433	Tsc22d1:3'UTR
chr14:76507337-76507407:+	200.444	2.346	Tsc22d1:3'UTR
chr14:76507649-76507699:+	29.583	1.834	Tsc22d1:3'UTR
chr14:78311268-78311318:-	131.236	5.756	intergenic
chr14:87048108-87048142:-	12.75	7.437	Diap3:intron
chr14:105894448-105894512:-	24.389	5.442	Spry2:intron
chr14:122756561-122756596:+	8.014	6.96	Pcca:intron
chr14:124524940-124524980:-	51.347	7.021	Fgf14:intron
chr15:12350867-12350882:+	7.014	3.847	Golph3:3'UTR
chr15:12923094-12923135:+	17.958	5.024	Drosha:intron
chr15:22610831-22610881:+	20.903	8.343	Cdh18:intron
chr15:25660952-25661002:+	24.986	8.086	Myo10:intron
chr15:26619697-26619747:-	20.889	7.979	Fbxl7:intron
chr15:28205038-28205116:+	21.778	7.888	Dnahc5:intron
chr15:31459010-31459016:-	9.264	3.584	March6:3'UTR
chr15:32280227-32280234:+	31.514	8.042	Sema5a:intron
chr15:34141108-34141115:+	30.569	1.14	Mtdh:3'UTR
chr15:34141971-34141999:+	20.931	5.245	Mtdh:3'UTR
chr15:35141412-35141457:-	18.444	8.162	Stk3:intron
chr15:36122607-36122634:-	5.792	6.714	Rgs22:intron
chr15:36600951-36600955:-	7.097	3.116	Pabpc1:CDS
chr15:38041486-38041513:-	36.944	9.165	Ubr5:CDS
chr15:38489900-38489946:-	56.042	2.106	Azin1:3'UTR
chr15:38907309-38907350:-	36.597	8.373	intergenic
chr15:39095286-39095313:-	35.236	7.656	Slc25a32:3'UTR
chr15:50659217-50659252:-	6.792	7.207	Trps1:3'UTR
chr15:55856602-55856648:-	11.889	7.751	Sntb1:intron
chr15:64795522-64795568:-	17.097	4.132	Adcy8:intron
chr15:73103492-73103542:-	31.639	6.661	Eif2c2:3'UTR
chr15:74995010-74995056:-	20.653	7.811	Ly6a:3'UTR
chr15:76354103-76354150:+	30.708	8.005	Maf1:3'UTR
chr15:77082413-77082430:-	13.014	4.127	Rbfox2:3'UTR
chr15:80078512-80078589:-	43.333	3.191	Snord83b:exon_unclassified
chr15:80082858-80082865:-	75.389	3.155	Rpl3:exon_unclassified
chr15:81705009-81705057:-	28.306	4.161	Rangap1:3'UTR
chr15:82175457-82175504:+	11.361	3.57	Srebf2:intron
chr15:82342707-82342772:+	48.25	3.969	Fam109b:intron
chr15:91774934-91774984:+	20.972	7.068	Lrrk2:CDS
chr15:96687840-96687895:-	50.181	1.719	Slc38a2:3'UTR
chr15:100665442-100665492:-	40	4.138	intergenic
chr15:101274530-101274557:+	14.319	3.946	Nr4a1:3'UTR
chr15:102432779-102432826:+	19	3.42	Sp1:3'UTR
chr16:14207083-14207130:-	16.889	8.521	Myh11:intron
chr16:18321378-18321428:-	10.792	7.389	D16H22S680E:intron
chr16:20372021-20372071:-	32.819	7.714	Abcc5:intron
chr16:21785431-21785481:-	33.972	8.266	Ehhadh:intron
chr16:22246199-22246249:-	19.167	3.224	Tra2b:3'UTR
chr16:22407515-22407537:-	17.569	7.315	Etv5:intron
chr16:23108969-23109017:+	725.903	2.156	Eif4a2:exon_unclassified
chr16:30314233-30314253:-	14.056	3.408	Atp13a3:3'UTR
chr16:30314497-30314509:-	10.528	2.278	Atp13a3:3'UTR
chr16:30314527-30314565:-	16.319	5.545	Atp13a3:3'UTR
chr16:33001928-33002024:+	30.181	1.855	Lrch3:intron
chr16:35219451-35219499:+	57.347	8.606	Adcy5:intron
chr16:38242123-38242173:+	23.528	8.514	Gsk3b:3'UTR
chr16:42092919-42092964:+	19.347	8.231	Lsamp:intron
chr16:57152961-57153011:+	24.361	4.801	Tomm70a:3'UTR
chr16:58424651-58424671:+	9.125	6.785	Dcbld2:CDS
chr16:63855029-63855062:-	13.958	7.398	Epha3:intron
chr16:64856436-64856483:+	24.236	4.364	Cggbp1:3'UTR
chr16:77512479-77512526:+	9.736	6.726	2810055G20Rik:intron
chr16:78330389-78330439:+	21.125	7.259	Cxadr:intron
chr16:84823028-84823046:+	21.236	4.473	Jam2:3'UTR
chr16:84825753-84825800:+	23.264	3.543	Jam2:3'UTR
chr16:90226202-90226226:+	7.972	2.26	Sod1:CDS
chr16:90719524-90719561:-	11.694	2.758	2610039C10Rik:3'UTR
chr16:96631873-96631902:-	43.347	8.395	Dscam:intron
chr17:5585199-5585238:+	30.819	8.71	Zdhhc14:intron
chr17:6440692-6440743:+	60.778	8.69	intergenic
chr17:8846820-8846855:+	7.014	7.253	Pde10a:intron
chr17:15806962-15807001:-	24.694	8.221	Rgmb:3'UTR
chr17:17716937-17716975:+	7.653	7.116	Vmn2r90:intron
chr17:19511593-19511634:+	7.417	6.196	Vmn2r100:intron
chr17:26017502-26017554:-	23.931	7.886	Rab11fip3:intron
chr17:29099609-29099660:+	28.722	8.609	Cdkn1a:3'UTR
chr17:29100547-29100583:+	8.944	6.926	Cdkn1a:3'UTR
chr17:30593420-30593467:-	18.778	4.101	Glo1:3'UTR
chr17:32804889-32804939:-	8.417	3.931	Zfp811:intron
chr17:34952025-34952075:-	176.889	3.187	1110038B12Rik:intron
chr17:36508166-36508216:+	17.486	6.501	intergenic
chr17:45569057-45569084:-	34.931	4.09	Hsp90ab1:CDS
chr17:45569102-45569105:-	34.931	5.869	Hsp90ab1:CDS
chr17:47848883-47848933:+	730.069	5.548	intergenic
chr17:70293129-70293179:+	23.764	8.335	Dlgap1:intron
chr17:70721241-70721291:+	10.222	7.533	Dlgap1:intron
chr17:78202313-78202363:+	31.611	6.162	Crim1:intron
chr17:78563947-78563997:+	29.542	8.064	Vit:intron
chr17:78858981-78859032:+	18.472	4.822	intergenic
chr17:79889368-79889385:-	48.903	9.792	Atl2:intron
chr17:80949005-80949028:+	36.472	8.494	Tmem178:intron
chr17:84419813-84419846:-	6.75	7.198	Thada:intron
chr17:87418421-87418471:-	28.819	7.806	1700011E24Rik:intron
chr18:5629053-5629100:+	10.403	7.559	Zeb1:intron
chr18:6203629-6203639:-	16.972	3.64	Kif5b:3'UTR
chr18:10805093-10805128:+	10.319	7.325	Mib1:intron
chr18:31887225-31887264:+	11.819	7.52	Wdr33:intron
chr18:34313400-34313429:+	18.181	8.142	Apc:CDS
chr18:34647448-34647498:+	44.167	3.787	intergenic
chr18:34937708-34937753:-	23.764	3.191	Hspa9:3'UTR
chr18:34937940-34937953:-	12.194	4.396	Hspa9:3'UTR
chr18:35370568-35370600:-	34.806	7.131	Sil1:intron
chr18:35584548-35584552:+	25.944	9.14	Matr3:CDS
chr18:35718744-35718776:-	15.194	3.857	Ecscr:intron
chr18:39468975-39469022:-	36.431	8.952	Nr3c1:intron
chr18:42960622-42960660:-	4.944	5.749	Ppp2r2b:intron
chr18:44447028-44447078:-	30.569	8.891	Mcc:intron
chr18:45526473-45526515:+	16.708	8.505	Kcnn2:intron
chr18:46587996-46588037:-	32.292	4.744	Tmed7:3'UTR
chr18:46607556-46607590:+	31.972	4.857	Eif1a:5'UTR
chr18:46881959-46881991:+	6.611	7.168	4833403I15Rik:intron
chr18:56957214-56957260:-	12.75	4.579	C330018D20Rik:3'UTR
chr18:57676522-57676568:+	10.347	7.551	1700011I03Rik:intron
chr18:60571611-60571646:+	35.722	8.116	Rbm22:intron
chr18:61589159-61589162:+	9.083	2.115	intergenic
chr18:63936024-63936074:+	24.806	8.397	Wdr7:intron
chr18:65981945-65981954:-	5.375	3.308	Lman1:3'UTR
chr18:67815926-67815939:+	34.486	9.288	Cep192:CDS
chr18:69674964-69674999:+	6.472	5.137	Tcf4:intron
chr18:73533430-73533462:-	22942.3	2.168	intergenic
chr18:74662076-74662128:+	40.972	8.799	Myo5b:intron
chr18:77201810-77201851:+	31.667	4.57	St8sia5:intron
chr18:77782302-77782344:+	29.028	4.009	Atp5a1:CDS
chr18:84202693-84202743:-	27.069	7.716	intergenic
chr18:90541272-90541320:+	21.278	5.369	Tmx3:3'UTR
chr19:3820901-3820947:-	34.417	8.87	intergenic
chr19:4078307-4078351:-	12.583	4.774	intergenic
chr19:4779568-4779571:-	22.889	5.758	Rbm14:intron
chr19:5799007-5799048:-	38.444	2.614	Malat1:exon_unclassified
chr19:5801239-5801253:-	24.236	2.531	Malat1:exon_unclassified
chr19:7259962-7260013:+	6.319	3.81	intergenic
chr19:8713372-8713413:-	27.014	3.465	Slc3a2:CDS
chr19:8723994-8724046:+	108.611	2.767	Snhg1:exon_unclassified
chr19:8724250-8724297:+	187.569	2.097	Snhg1:exon_unclassified
chr19:8725339-8725390:+	812.306	2.075	Snhg1:exon_unclassified
chr19:8725646-8725656:+	131.139	2.062	Snhg1:exon_unclassified
chr19:8725940-8725991:+	78.556	3.332	Snord22:exon_unclassified
chr19:9003333-9003373:+	9.25	6.804	Ahnak:CDS
chr19:10722246-10722291:-	21.986	8.638	Cd5:intron
chr19:16221437-16221474:+	60.597	8.686	Gnaq:intron
chr19:18867915-18867965:+	29.208	8.463	Trpm6:intron
chr19:24219313-24219364:-	31.986	8.064	Tjp2:intron
chr19:31151144-31151184:-	11.611	5.779	Prkg1:intron
chr19:31304537-31304580:-	8.389	6.663	Prkg1:intron
chr19:31402203-31402255:-	18.444	8.162	Prkg1:intron
chr19:37201768-37201811:-	26.764	8.185	Cpeb3:intron
chr19:38897333-38897383:+	23.847	8.171	Tbc1d12:intron
chr19:38953571-38953599:+	29.556	5.843	Hells:CDS
chr19:42371644-42371677:-	7.403	6.845	Crtac1:intron
chr19:44306251-44306301:+	37.278	3.723	Scd2:3'UTR
chr19:44396286-44396325:-	35.722	5.734	Scd1:3'UTR
chr19:47279013-47279063:-	38.167	8.434	Sh3pxd2a:intron
chr19:55807132-55807182:+	20.764	7.819	Tcf7l2:intron
chr19:58204151-58204195:+	40.778	9.792	intergenic
chr2:4389987-4390037:+	36.514	8.633	Frmd4a:intron
chr2:4906879-4906908:+	26.319	7.023	Sephs1:3'UTR
chr2:5186974-5187019:+	32.472	9.201	Ccdc3:intron
chr2:6240976-6241023:+	20.292	7.108	A230108P19Rik:intron
chr2:15078861-15078911:+	24.681	3.906	Arl5b:3'UTR
chr2:22777617-22777669:+	8.042	6.965	Apbb1ip:intron
chr2:25133687-25133737:-	29.861	8.205	intergenic
chr2:26483152-26483194:-	37.792	8.683	Notch1:intron
chr2:29180242-29180256:+	22.639	7.944	Setx:3'UTR
chr2:29181777-29181817:+	31.125	5.332	Setx:3'UTR
chr2:34774578-34774580:+	20.111	1.203	Hspa5:CDS
chr2:35181493-35181543:-	21.347	8.373	Rab14:3'UTR
chr2:37350393-37350433:-	11.292	4.133	Pdcl:3'UTR
chr2:37565558-37565605:+	17.361	2.769	Rabgap1:3'UTR
chr2:40944979-40945025:-	17.972	8.347	Lrp1b:intron
chr2:48327209-48327254:-	21.917	8.049	intergenic
chr2:49774441-49774487:+	14.889	4.684	Kif5c:3'UTR
chr2:60444791-60444821:-	5.139	6.319	Pla2r1:intron
chr2:66500976-66501026:+	22.986	8.287	Gm13629:intron
chr2:67871149-67871186:+	15.125	7.876	intergenic
chr2:85653379-85653429:+	21.528	4.535	intergenic
chr2:90795156-90795199:+	14.667	7.639	Agbl2:intron
chr2:91169071-91169153:-	68.833	7.584	Madd:intron
chr2:91584137-91584187:+	11.569	7.712	Ckap5:intron
chr2:91697307-91697357:-	17.514	4.766	Atg13:intron
chr2:98667090-98667164:-	25.931	6.213	intergenic
chr2:106514735-106514779:-	14.528	8.304	Gm14015:intron
chr2:113205954-113206010:-	70	5.443	Ryr3:intron
chr2:118215081-118215123:-	15.472	8.131	Fsip1:intron
chr2:118832142-118832184:+	26.764	4.892	D2Ertd750e:intron
chr2:119631158-119631225:+	19.889	6.435	Nusap1:intron
chr2:120640734-120640781:-	43.639	2.888	intergenic
chr2:122637987-122638037:+	25.583	8.857	AA467197:5'UTR
chr2:127829230-127829272:-	32.083	8.068	Bub1:intron
chr2:129211454-129211464:+	23.542	3.744	Slc20a1:3'UTR
chr2:130276337-130276369:+	19.181	1.515	Nop56:intron
chr2:145313419-145313469:+	15.556	8.402	Slc24a3:intron
chr2:145829489-145829539:+	32.625	7.985	Rin2:intron
chr2:156455008-156455058:-	26.042	8.008	intergenic
chr2:156479318-156479321:+	35.444	8.453	Epb4.1l1:intron
chr2:156481029-156481079:+	15.917	7.057	Epb4.1l1:intron
chr2:162052053-162052100:-	13.486	7.518	Ptprt:intron
chr2:163064478-163064500:+	29.792	4.719	Mybl2:CDS
chr2:164893545-164893582:+	10.167	7.526	intergenic
chr2:166655056-166655138:-	177.292	5.269	Prex1:intron
chr2:166863464-166863514:+	32.625	8.793	Arfgef2:intron
chr2:167063477-167063535:+	257.931	3.65	1500012F01Rik:intron
chr2:167065331-167065358:+	48.056	3.45	Snord12:exon_unclassified
chr2:167299660-167299705:-	24.653	3.607	B4galt5:3'UTR
chr2:168748695-168748736:-	32.528	8.088	Sall4:3'UTR
chr2:170598511-170598562:-	45.708	9.109	4930470P17Rik:intron
chr2:180658051-180658101:-	21.708	3.112	Dido1:3'UTR
chr3:4339062-4339093:+	79.153	4.548	intergenic
chr3:30809548-30809587:+	20.375	8.792	Sec62:intron
chr3:30905932-30905977:-	4.764	6.432	Phc3:3'UTR
chr3:31152084-31152136:+	14.014	4.326	Cldn11:intron
chr3:34046556-34046585:+	25.389	8.846	Fxr1:CDS
chr3:34046965-34046986:+	25.389	8.846	Fxr1:CDS
chr3:34551697-34551747:+	18.222	7.63	intergenic
chr3:39635979-39636030:-	90.167	5.265	intergenic
chr3:45366546-45366596:-	35.917	8.761	2610316D01Rik:intron
chr3:81101199-81101249:+	24.944	8.82	Pdgfc:intron
chr3:86140636-86140645:-	44.375	2.408	Rnu73b:exon_unclassified
chr3:87775306-87775356:-	28	7.402	intergenic
chr3:95322777-95322806:+	10	2.877	Lass2:CDS
chr3:95661663-95661719:+	42.472	4.529	Mcl1:3'UTR
chr3:96560809-96560812:+	29.5	2.077	Txnip:3'UTR
chr3:108107498-108107543:-	17.097	1.948	Gnai3:3'UTR
chr3:127254139-127254176:-	28.931	8.619	Ank2:intron
chr3:133473605-133473655:-	34.361	8.697	Tet2:CDS||5'UTR
chr3:135452840-135452875:+	9.319	4.37	Ube2d3:intron
chr3:135570798-135570850:+	50.361	8.331	Manba:3'UTR
chr3:142803720-142803727:-	5.944	3.664	Pkn2:CDS
chr3:144597454-144597497:+	11.333	2.087	Sep15:3'UTR
chr3:146910165-146910206:+	6.181	6.585	Ttll7:intron
chr3:152236062-152236093:+	13.903	3.742	Fubp1:3'UTR
chr3:153911610-153911638:-	49.028	2.089	Rabggtb:intron
chr3:153974355-153974397:+	29.486	8.647	Slc44a5:intron
chr4:5801362-5801410:+	11.306	7.679	Fam110b:intron
chr4:11528181-11528224:+	14.778	5.006	1110037F02Rik:intron
chr4:24496718-24496729:+	5.542	6.428	Mms22l:5'UTR
chr4:33245673-33245723:-	29.389	4.356	Pnrc1:3'UTR
chr4:34908435-34908479:-	27.375	9.218	intergenic
chr4:35115539-35115594:-	6.889	4.09	Mob3b:intron
chr4:48662976-48663024:+	32.528	1.918	Tmeff1:3'UTR
chr4:53860699-53860724:+	11.208	3.759	Tmem38b:3'UTR
chr4:53860743-53860776:+	116.889	4.166	Tmem38b:3'UTR
chr4:56878030-56878080:-	13.292	3.756	Tmem245:3'UTR
chr4:57736641-57736680:+	31.583	9.161	intergenic
chr4:62523323-62523361:-	13.264	6.687	intergenic
chr4:62593455-62593479:+	121.806	3.952	Rgs3:intron
chr4:65254789-65254839:+	25.736	7.544	Pappa:intron
chr4:66222753-66222782:-	8.458	7.523	Astn2:intron
chr4:82804553-82804603:-	24.042	8.182	Zdhhc21:3'UTR
chr4:83039696-83039744:-	73	6.268	Frem1:intron
chr4:93593991-93594041:-	17.569	6.993	intergenic
chr4:96023112-96023136:+	24.194	4.647	Hook1:3'UTR
chr4:98934508-98934555:+	37.389	4.514	Usp1:CDS
chr4:100306886-100306918:+	28.667	8.606	Ror1:intron
chr4:102401045-102401074:+	25.722	5.04	Pde4b:intron
chr4:103190927-103190975:-	33.431	8.368	Slc35d1:intron
chr4:103666492-103666532:+	21.542	8.194	Dab1:intron
chr4:106448195-106448236:-	24.111	8.549	Pcsk9:intron
chr4:116603231-116603281:-	9.306	7.398	Nasp:intron
chr4:117154095-117154110:-	45.306	1.823	Rps8:intron
chr4:117202625-117202639:+	54.792	1.881	intergenic
chr4:119137145-119137158:+	42.653	3.448	Slc2a1:3'UTR
chr4:126179267-126179318:-	29.014	8.164	Thrap3:3'UTR
chr4:129310095-129310137:-	34.764	3.388	Rbbp4:CDS
chr4:132055830-132055878:-	23.264	7.72	Epb4.1:intron
chr4:132270079-132270088:-	24.361	2.587	Rnu11:exon_unclassified
chr4:132739908-132739958:-	33.375	8.366	Smpdl3b:intron
chr4:136797172-136797204:-	21.097	7.842	Ephb2:intron
chr4:137025025-137025063:-	10.847	7.034	Zbtb40:intron
chr4:137787250-137787297:-	18.597	8.397	Alpl:intron
chr4:140710221-140710261:+	19.292	6.865	Rcc2:intron
chr4:141109102-141109146:+	6.556	6.155	Spata21:intron
chr4:142232752-142232802:-	20.181	7.64	Kazn:intron
chr4:149817752-149817800:+	104.833	1.189	intergenic
chr4:150631609-150631651:-	20.25	8.783	Slc45a1:intron
chr5:3409335-3409385:+	22.764	8.466	Cdk6:intron
chr5:3561206-3561253:+	8.472	3.544	Fam133b:intron
chr5:4075921-4075971:+	17.556	8.314	Akap9:intron
chr5:21452093-21452143:+	24.972	4.981	Fam185a:intron
chr5:24812440-24812485:-	13.833	7.747	Rheb:intron
chr5:30131987-30132009:-	5.569	3.783	Hadha:intron
chr5:30441391-30441441:-	6.333	6.62	Otof:intron
chr5:32492124-32492165:+	26.986	4.764	Ppp1cb:3'UTR
chr5:33255054-33255104:-	58.264	8.929	Ctbp1:intron
chr5:35873591-35873635:+	22.208	8.653	Ablim2:intron
chr5:36953020-36953070:+	33.389	8.019	Ppp2r2c:3'UTR
chr5:41698766-41698821:-	53	7.283	Rab28:intron
chr5:49139044-49139100:-	19.778	8.486	Kcnip4:intron
chr5:53655087-53655124:+	12.389	7.811	Rbpj:3'UTR
chr5:67425315-67425355:-	38.972	8.142	Bend4:intron
chr5:75655389-75655409:+	17.472	4.084	Kit:3'UTR
chr5:81280363-81280399:+	12.472	7.598	Lphn3:intron
chr5:89032076-89032121:+	5.833	6.987	Slc4a4:intron
chr5:91617085-91617135:+	27.472	8.375	Parm1:intron
chr5:92396322-92396372:+	40.458	8.518	Art3:intron
chr5:92694151-92694219:+	22.153	5.534	Shroom3:intron
chr5:103582871-103582909:+	30.153	8.872	Ptpn13:intron
chr5:105236701-105236751:-	33.278	8.121	Gbp10:intron
chr5:108077059-108077099:+	17.042	4.286	Mtf2:intron
chr5:108107253-108107287:+	33.861	4.717	Mtf2:3'UTR
chr5:111752268-111752316:-	62.014	8.812	E130006D01Rik:intron
chr5:112438287-112438333:-	15.958	8.176	Sez6l:intron
chr5:115490363-115490372:+	31.861	1.543	intergenic
chr5:115523165-115523195:+	5.361	6.865	Pxn:intron
chr5:116486405-116486452:-	17.306	8.293	Srrm4:intron
chr5:118575252-118575302:+	14.694	8.057	Med13l:intron
chr5:122456945-122456994:-	38.75	1.181	Atp2a2:3'UTR
chr5:124869080-124869126:+	20.417	8.794	Zfp664:intron
chr5:128231394-128231444:-	24.708	8.392	Tmem132d:intron
chr5:130045504-130045547:+	25.472	8.266	Crcp:intron
chr5:131122333-131122374:-	16.833	6.253	Wbscr17:intron
chr5:132515294-132515330:-	4.042	6.458	Auts2:intron
chr5:135716366-135716401:+	7.639	6.376	Por:intron
chr5:137792826-137792867:+	26.389	8.317	Zcwpw1:intron
chr5:138374800-138374812:+	18.528	6.806	intergenic
chr5:141785343-141785425:+	7.722	7.129	Sdk1:intron
chr5:141785449-141785452:+	6.972	6.566	Sdk1:intron
chr5:142812240-142812290:-	26.181	8.668	Tnrc18:intron
chr5:144245709-144245759:-	31.542	8.574	intergenic
chr5:147082184-147082224:+	6.375	2.837	Polr1d:intron
chr5:149617356-149617401:-	25.083	3.741	Hsph1:3'UTR
chr6:6997253-6997313:+	78.625	6.204	Acn9:intron
chr6:12558654-12558699:-	35.667	9.114	Thsd7a:intron
chr6:23685864-23685914:-	22	8.902	Cadps2:intron
chr6:32940157-32940200:-	28.861	7.808	Chchd3:intron
chr6:38173805-38173855:-	19.819	8.074	D630045J12Rik:intron
chr6:39336264-39336281:-	38.264	6.045	Slc37a3:3'UTR
chr6:39336311-39336364:-	64.486	4.509	Slc37a3:3'UTR
chr6:39410151-39410180:-	32.069	1.982	Mkrn1:CDS
chr6:39910049-39910099:+	26.222	7.67	intergenic
chr6:40254284-40254313:+	10.069	3.654	intergenic
chr6:46295243-46295291:+	5.264	5.991	Cntnap2:intron
chr6:47484809-47484848:+	11.861	3.923	Cul1:5'UTR
chr6:51463227-51463244:-	24.208	1.905	Hnrnpa2b1:3'UTR
chr6:51466628-51466666:-	24.181	2.132	Hnrnpa2b1:CDS
chr6:54262795-54262835:-	28.014	5.573	intergenic
chr6:55068099-55068130:+	30.347	7.44	Gars:CDS
chr6:60250840-60250890:+	2106.19	6.164	intergenic
chr6:73084934-73084985:-	728.611	5.547	Dnahc6:intron
chr6:79939488-79939533:-	23.889	8.536	intergenic
chr6:83341958-83342003:+	15.528	7.914	intergenic
chr6:83809912-83809956:-	31.889	6.367	Paip2b:CDS
chr6:86209483-86209533:+	18.431	7.062	Tgfa:exon_unclassified
chr6:87192013-87192047:-	7.167	7.021	Antxr1:intron
chr6:89319172-89319183:-	14.569	4.106	Plxna1:3'UTR
chr6:91756740-91756790:+	21.597	3.69	Slc6a6:3'UTR
chr6:97318285-97318395:-	8.736	6.432	Frmd4b:intron
chr6:100867950-100867962:+	22.875	5.052	Ppp4r2:3'UTR
chr6:108108070-108108120:-	11.264	7.673	Sumf1:3'UTR
chr6:108795389-108795433:+	13.069	8.151	Arl8b:intron
chr6:112234182-112234229:-	6.528	4.301	intergenic
chr6:113324544-113324573:+	16.806	3.905	Brpf1:3'UTR
chr6:113447783-113447829:+	29.333	5.617	Jagn1:3'UTR
chr6:115807817-115807854:-	42.972	1.733	Rpl32:CDS
chr6:117560573-117560623:+	22.875	8.958	intergenic
chr6:119951071-119951083:-	41.389	2.722	Wnk1:CDS
chr6:122714137-122714140:+	25.389	1.522	intergenic
chr6:126725238-126725274:+	27.389	4.926	intergenic
chr6:126738144-126738195:-	16.778	6.441	Kcna6:3'UTR
chr6:127198712-127198751:+	9.556	7.214	9330179D12Rik:intron
chr6:136616309-136616361:-	62.125	8.914	Plbd1:intron
chr6:142828326-142828376:-	13.639	5.405	St8sia1:3'UTR
chr6:146420094-146420144:-	16.167	7.61	Itpr2:intron
chr6:149434326-149434365:+	9.778	7.469	Bicd1:intron
chr7:16471856-16471907:+	576.986	3.792	intergenic
chr7:16610605-16610649:-	27.014	6.566	Grlf1:intron
chr7:30553928-30553978:+	31.181	8.557	Hspb6:intron
chr7:30958217-30958220:+	28.389	8.133	intergenic
chr7:34150849-34150876:-	29.875	4.632	Uba2:CDS
chr7:42706598-42706645:-	29.389	6.087	intergenic
chr7:44250136-44250186:+	36.903	2.907	Snord88a:5'UTR
chr7:45126866-45126908:-	33.556	2.954	Snord33:exon_unclassified
chr7:45127412-45127447:-	44.542	1.849	Snord32a:5'UTR
chr7:45155964-45156003:+	15.139	4.754	Pih1d1:intron
chr7:45525533-45525575:-	29.361	8.319	Ppp1r15a:5'UTR
chr7:51639020-51639037:+	33.069	8.353	Slc17a6:intron
chr7:55906014-55906054:+	8.014	7.182	Cyfip1:intron
chr7:58736856-58736906:+	15.264	7.697	Atp10a:intron
chr7:64997396-64997450:-	11.75	7.997	Fam189a1:intron
chr7:68294311-68294361:+	14.458	7.811	Fam169b:intron
chr7:82731380-82731431:+	147.111	5.965	Eftud1:intron
chr7:84371079-84371129:-	17.333	8.295	Arnt2:intron
chr7:97886424-97886448:+	7.139	6.793	Pak1:CDS
chr7:98697026-98697072:-	19.542	5.171	intergenic
chr7:99479582-99479634:-	39.542	2.787	Snord15b:3'UTR
chr7:99497763-99497813:+	45.611	4.972	intergenic
chr7:100837815-100837859:+	8.694	6.425	Fam168a:3'UTR
chr7:102306962-102307012:+	20.028	8.504	Stim1:intron
chr7:111072348-111072388:-	48.958	1.876	Eif4g2:3'UTR
chr7:111075109-111075159:-	17.875	4.067	Eif4g2:CDS
chr7:112515004-112515046:+	18.014	4.103	Parva:intron
chr7:116272625-116272655:-	29.667	8.486	Plekha7:intron
chr7:120380532-120380579:+	23.569	8.002	Abca15:intron
chr7:122768834-122768854:+	65.667	3.089	Cacng3:CDS
chr7:130623118-130623159:-	11.111	7.654	intergenic
chr7:131171820-131171868:-	50.792	7.676	intergenic
chr7:142380953-142380996:-	14.472	7.035	Ctsd:CDS
chr7:144056784-144056847:+	25.847	8.649	intergenic
chr7:144864671-144864694:+	25.403	3.717	Fgf4:3'UTR
chr7:144865061-144865133:+	74.639	4.862	Fgf4:3'UTR
chr8:13020249-13020262:+	26.75	4.408	Mcf2l:3'UTR
chr8:14349741-14349784:+	36.625	7.79	Dlgap2:intron
chr8:22219319-22219373:+	60.028	8.502	intergenic
chr8:23174150-23174212:-	170.167	6.489	Agpat6:3'UTR
chr8:24907790-24907840:-	11.167	6.786	Adam32:intron
chr8:25078758-25078816:-	18.222	7.63	Plekha2:intron
chr8:25801688-25801738:+	37.389	8.404	Lsm1:intron
chr8:33329690-33329740:-	29.403	9.058	Wrn:intron
chr8:36568844-36568894:-	10.458	2.163	Dlc1:3'UTR
chr8:37821186-37821232:-	6.375	7.115	Sgcz:intron
chr8:40507567-40507619:+	39.153	8.355	intergenic
chr8:41014735-41014770:-	9.111	6.952	Mtus1:intron
chr8:47719282-47719327:+	37.111	2.934	intergenic
chr8:54521186-54521212:-	28.556	3.508	Spcs3:3'UTR
chr8:54523015-54523041:-	9.375	3.212	Spcs3:3'UTR
chr8:62089389-62089439:-	19.319	8.715	Anxa10:intron
chr8:66320430-66320453:+	7.403	3.129	March1:intron
chr8:73233823-73233839:-	31.792	8.585	Large:intron
chr8:75100012-75100062:+	39.736	3.597	Hmox1:CDS||3'UTR
chr8:79227360-79227410:-	26.083	7.563	1700011L22Rik:intron
chr8:79675007-79675057:+	28.944	2.878	Otud4:3'UTR
chr8:82995586-82995636:+	21.319	7.857	Rnf150:intron
chr8:85050215-85050227:+	69.625	2.895	Tnpo2:intron
chr8:85050238-85050259:+	82.139	2.983	Tnpo2:intron
chr8:91549510-91549548:+	33.708	7.592	Fto:intron
chr8:93916244-93916279:+	37.653	6.356	Gnao1:intron
chr8:94692958-94693009:-	29.403	7.736	Pllp:intron
chr8:94903545-94903566:-	43.264	3.765	Ccdc102a:intron
chr8:106134429-106134475:-	21.028	8.352	Esrp2:intron
chr8:110838579-110838589:-	31.667	1.217	Sf3b3:exon_unclassified
chr8:111981227-111981277:-	36.681	8.502	Adat1:intron
chr8:114549553-114549603:+	31.514	8.158	Wwox:intron
chr8:114628696-114628746:+	12.514	3.642	Wwox:intron
chr8:116657609-116657645:-	9.597	4.601	Cdyl2:intron
chr8:121592255-121592296:+	26.639	8.041	Map1lc3b:intron
chr8:121882074-121882081:-	51.139	3.627	Slc7a5:3'UTR
chr8:123103044-123103105:+	447.556	3.503	Rpl13:exon_unclassified
chr8:123554074-123554125:-	122.361	3.952	intergenic
chr8:123564301-123564353:-	138.153	7.351	intergenic
chr8:123599924-123599957:-	164.514	5	intergenic
chr8:124282378-124282417:+	35.167	9.093	Galnt2:intron
chr9:18312806-18312848:+	9.889	3.289	Chordc1:CDS
chr9:21670480-21670505:+	8.431	7.255	Smarca4:CDS
chr9:24468092-24468127:-	24.972	8.6	Dpy19l1:intron
chr9:34601531-34601581:+	31.306	8.733	Kirrel3:intron
chr9:37026458-37026484:+	8	5.064	intergenic
chr9:43124226-43124269:-	7.375	6.188	Pou2f3:3'UTR
chr9:44720059-44720101:-	18.931	8.422	Phldb1:intron
chr9:45230430-45230475:+	26.597	7.797	BC049352:intron
chr9:46315186-46315240:-	59.556	8.491	4931429L15Rik:intron
chr9:48746933-48746983:-	17.208	8.062	Zbtb16:intron
chr9:53572805-53572858:+	18.944	5.549	Npat:3'UTR
chr9:53572871-53572926:+	7.736	3.809	Npat:3'UTR
chr9:56223575-56223628:-	138.764	4.541	C230081A13Rik:intron
chr9:57759034-57759039:-	25.375	7.845	Clk3:exon_unclassified
chr9:58676331-58676394:-	19.708	6.542	2410076I21Rik:intron
chr9:59552848-59552899:+	43.833	8.897	Hexa:intron
chr9:59665903-59665945:+	6.75	4.06	Pkm:CDS
chr9:62794026-62794074:-	29.514	4.448	Fem1b:3'UTR
chr9:62795494-62795545:-	54.5	5.266	Fem1b:3'UTR
chr9:63312431-63312481:-	7.653	6.893	Map2k5:intron
chr9:64175046-64175115:+	175.889	2.583	Rpl4:intron
chr9:64177727-64177729:+	6.403	2.689	Rpl4:CDS
chr9:65196620-65196628:-	122.347	1.791	intergenic
chr9:65201733-65201783:-	80.417	1.771	intergenic
chr9:70229760-70229810:+	23.806	4.338	Myo1e:intron
chr9:70300695-70300734:+	13.819	5.03	Myo1e:intron
chr9:71519673-71519715:-	12.236	4.333	Myzap:intron
chr9:72743545-72743571:+	17.472	2.625	Nedd4:CDS
chr9:74059392-74059433:+	18.903	5.224	intergenic
chr9:85737493-85737503:-	11.069	7.911	Ibtk:CDS||5'UTR
chr9:96184464-96184494:+	16.208	4.14	intergenic
chr9:102127950-102128006:+	664.208	5.6	intergenic
chr9:103350256-103350354:+	56.181	7.769	Topbp1:3'UTR
chr9:103691069-103691119:-	30.111	7.976	Tmem108:intron
chr9:111450498-111450555:+	26.583	4.677	Dclk3:intron
chr9:111613920-111613971:-	136.097	8.724	Stac:intron
chr9:113975425-113975437:+	11.708	4.481	Ubp1:3'UTR
chr9:113977144-113977194:+	15.389	7.901	Ubp1:3'UTR
chr9:114509521-114509559:-	10.403	4.014	intergenic
chr9:114733916-114733962:+	10.75	7.606	Cmtm6:intron
chr9:115626619-115626669:-	191.222	4.941	intergenic
chr9:121461459-121461512:+	24.778	7.936	Trak1:intron
chr9:121907795-121907845:+	18.389	7.381	Ccbp2:intron
chrX:6106947-6106999:+	478.097	5.239	intergenic
chrX:6529096-6529127:+	7.472	7.344	Shroom4:intron
chrX:7728136-7728181:+	22.208	5.653	Wdr45:3'UTR
chrX:18323443-18323493:-	176.347	4.497	intergenic
chrX:20689048-20689083:+	10.875	7.623	Cdk16:intron
chrX:23805146-23805196:+	28.736	8.609	Wdr44:3'UTR
chrX:37148116-37148157:+	9	6.028	Nkap:3'UTR
chrX:48874112-48874148:-	20.639	8.132	Gm595:intron
chrX:52935035-52935085:+	24.319	8.784	Phf6:intron
chrX:56925054-56925104:+	21.111	7.705	intergenic
chrX:57053977-57054024:+	37.014	8.805	Htatsf1:5'UTR
chrX:79402432-79402469:-	8.167	7.473	intergenic
chrX:101958291-101958355:+	24.667	7.219	Nhsl2:intron
chrX:103432254-103432286:+	6.542	7.152	Tsix:intron
chrX:103969348-103969395:-	97.028	9.043	Rlim:intron
chrX:105833303-105833342:-	10.708	7.6	Atrx:intron
chrX:136170217-136170250:-	30.819	5.541	Tceal8:3'UTR
chrX:136277561-136277611:+	19.694	6.605	intergenic
chrX:139201621-139201656:-	38.556	7.946	intergenic
chrX:151777711-151777762:+	89.042	7.884	intergenic
chrX:151901507-151901540:+	26.097	8.301	Huwe1:CDS
chrX:160123569-160123620:-	24.486	2.119	Pdha1:3'UTR
