# Supplementary material for: Repressing Ago2 mRNA translation by Trim71 maintains pluripotency through inhibiting let-7 microRNAs
Source: eLife. 2021 Feb 18;10:e66288. doi: 10.7554/eLife.66288 (PMC7906602; doi:10.7554/eLife.66288)
Supplement: Supplementary file 2. — The first tab lists the differentially expressed miRNAs, and the second tab lists the non-differentially expressed miRNAs. The expression level is indicated by reads per million (RPM). [file elife-66288-supp2.xlsx]

## Sheet: diff
miRNAs	WT_replicate1	WT_replicate2	WT_replicate3	WT_replicate4	CLIP_deletion_replicate1	CLIP_deletion_replicate2	CLIP_deletion_replicate3	CLIP_deletion_replicate4	fold change	P-value
mmu-let-7b-5p	5717.05	9894.75	3216.02	1360.21	86670.9	120628	119813	106084	4.33055	1.42003e-06
mmu-let-7d-3p	525.351	820.617	213.307	137.164	6253.25	6753.36	8177.79	8182.54	4.045	8.02894e-06
mmu-let-7d-5p	102505	149084	43186.5	20437.5	1.12255e+06	1.39532e+06	1.46927e+06	987912	3.84429	2.99465e-06
mmu-miR-592-5p	1035.25	741.712	426.614	171.455	8964.45	17125.9	10884.1	3638.82	3.76424	5.71883e-06
mmu-miR-98-5p	37408.1	56906.6	12700	6320.98	374831	541594	333936	124529	3.35005	4.69067e-05
mmu-let-7i-5p	142231	205628	55673.2	19751.6	1.45995e+06	1.70063e+06	1.29053e+06	477494	3.32008	4.52912e-05
mmu-miR-326-3p	525.351	789.055	607.105	251.468	6355.28	7574.21	5706.8	2599.16	3.06056	5.09456e-07
mmu-miR-147-5p	1050.7	1278.27	311.757	182.885	5466.13	11044.2	7957.16	3330.77	3.0433	7.70843e-05
mmu-let-7a-5p	329596	438573	182640	94917.6	2.11764e+06	2.56721e+06	2.75184e+06	1.91392e+06	2.99406	1.49301e-06
mmu-let-7j	2302.27	3724.34	1066.54	411.492	17535.3	23804.7	16708.6	7258.39	2.89967	6.55314e-05
mmu-let-7f-5p	414857	618430	188317	80046.7	2.99054e+06	4.06534e+06	2.96129e+06	1.28855e+06	2.88908	2.58717e-05
mmu-let-7g-5p	493042	767040	244122	82892.9	3.08058e+06	4.01519e+06	3.06539e+06	1.45938e+06	2.67025	6.43263e-05
mmu-miR-3962	247.224	520.776	98.4495	80.0124	1720.01	2276	1764.99	808.627	2.56972	0.000247487
mmu-miR-344-3p	154.515	157.811	213.307	91.4427	714.241	1156.65	1206.08	654.603	2.30079	2.34612e-05
mmu-let-7c-5p	46292.7	81414.7	57543.7	24163.7	260916	321419	319448	255141	2.28697	1.68308e-06
mmu-miR-466g	38010.7	35270.8	17359.9	21306.2	133184	156932	131712	83904.7	1.84722	2.32363e-05
mmu-let-7e-5p	204979	215980	133990	78229.3	729648	722031	654855	450887	1.77633	5.58372e-06
mmu-miR-344b-3p	355.384	536.557	328.165	194.316	1574.24	1884.23	1912.07	616.097	1.75895	0.000167387
mmu-miR-1981-5p	30130.4	38442.8	18557.7	22757.8	122208	104397	112989	99750	1.7427	0.000101043
mmu-miR-3082-5p	602.608	536.557	508.656	480.074	2098.99	1996.16	2750.44	1732.77	1.69354	0.000344497
mmu-miR-1981-3p	8992.77	11899	6546.89	2366.08	26616.4	32404.9	30475.5	19888.4	1.69241	0.000137184
mmu-miR-669c-5p	134752	160020	82763.2	89533.9	500493	550716	433261	359666	1.69114	1.88067e-05
mmu-miR-669h-5p	3368.42	5460.26	2149.48	1943.16	11617.3	19103.4	12590.3	6873.33	1.64203	8.1871e-05
mmu-miR-3095-3p	1792.37	1609.67	1329.07	994.44	6355.28	3637.86	5898.01	4601.47	1.61585	0.000576266
mmu-miR-467d-5p	7401.26	10194.6	7022.73	6778.19	20465.2	38953.1	33431.9	21987	1.53211	7.83048e-05
mmu-miR-669o-5p	33112.5	43492.7	21576.8	13407.8	98419.4	154824	75718.1	46669.3	1.43956	0.00018337
mmu-miR-669f-5p	13751.8	14976.3	7974.41	5475.13	37140.5	50370.4	32622.9	14882.6	1.34738	0.000303042
mmu-miR-467e-5p	34673.1	46506.9	26614.2	13042	73610.5	172360	88617.2	44127.9	1.31964	0.000477177
mmu-miR-744-5p	8189.29	7827.43	8072.86	6298.12	21164.8	19439.2	28048.6	21601.9	1.30805	0.000904478
mmu-miR-466h-5p	20334.2	22472.3	14619.7	7418.29	50477.9	81693.3	40315.3	23334.7	1.27185	0.000392346
mmu-miR-669l-5p	56320.7	68900.3	39166.5	20746.1	140254	212432	120505	66962	1.24209	0.000304674
mmu-miR-467c-5p	164636	203308	132332	63644.2	383387	590490	406874	201021	1.18927	0.000120302
mmu-miR-505-3p	1467.89	2209.35	2018.21	1085.88	4037.65	7107.82	4662.52	2618.41	1.1024	0.000817639
mmu-miR-23b-3p	53168.6	66280.6	42497.4	31627.8	89688.2	161279	110297	74413	0.858112	0.000767152
mmu-miR-1983	41487.2	43050.8	33718.9	23980.9	82764.5	115479	83395.8	45706.7	0.856872	0.000491433
mmu-miR-411-3p	169642	198763	184117	106782	110430	186632	131021	72699.4	-0.738504	0.000747056
mmu-miR-10b-5p	383877	607967	466388	235454	320082	363861	316772	204852	-0.747978	0.000871049
mmu-miR-182-5p	8.43334e+06	1.16363e+07	9.23776e+06	4.18491e+06	6.88611e+06	8.29514e+06	5.82651e+06	3.29082e+06	-0.751926	0.000794386
mmu-miR-337-5p	151131	157448	160423	97775.2	99745.9	115162	107164	71313.2	-0.823521	0.000595727
mmu-miR-541-5p	2.55388e+06	2.83459e+06	2.72805e+06	1.84051e+06	1.78369e+06	1.77615e+06	1.54732e+06	1.32001e+06	-0.908494	0.000545743
mmu-miR-154-5p	70397	97290.5	77332.1	34771.1	41528	66377	44448.3	21197.6	-1.00729	0.000338111
mmu-miR-369-5p	10028	11220.4	10501.3	7006.8	5145.45	9794.24	7074.67	2849.45	-1.04046	0.000811301
mmu-miR-341-3p	136622	195843	158175	84241.6	100970	124657	92735.5	33096	-1.06483	0.000601778
mmu-miR-379-5p	524655	691828	636410	284341	320913	465851	340084	139353	-1.0929	0.000131979
mmu-miR-299a-3p	29172.4	42782.6	39970.5	15042.3	18439.1	31584.1	16208.5	7874.49	-1.11736	0.000988962
mmu-miR-411-5p	405493	542160	493330	249490	214447	333918	274706	139238	-1.12896	1.84459e-05
mmu-miR-374b-5p	15915	20941.5	16769.2	12333.3	4795.62	13805.2	8751.41	6546.03	-1.29488	0.000543472
mmu-miR-127-5p	15405.1	22835.3	17146.6	7452.58	8687.5	13898.5	6809.92	3022.73	-1.30242	0.000676025
mmu-miR-92a-1-5p	112919	97448.3	142292	85864.7	53247.4	73596.7	55817.8	40585.4	-1.31406	9.67998e-05
mmu-miR-376b-5p	42816.1	62161.8	50635.8	16596.9	19430.3	34960.8	21327	8914.15	-1.33901	0.000378352
mmu-miR-31-5p	34008.7	44881.5	48502.8	22289.2	15523.8	18562.4	18032.3	11455.6	-1.50478	1.19696e-05
mmu-miR-542-3p	13659.1	19663.3	14291.6	9018.54	4343.75	7313.03	6383.38	5025.04	-1.54494	4.42456e-05
mmu-miR-302c-3p	8142.93	8474.45	8893.27	9224.29	3746.12	4925.1	4250.68	2560.65	-1.57629	0.000167007
mmu-miR-302d-5p	17027.5	12514.4	19886.8	13739.3	4897.65	4160.22	9457.4	5352.34	-1.6939	0.000907508
mmu-miR-542-5p	1375.18	1578.11	935.27	765.833	451.867	503.704	676.579	173.277	-1.72264	0.000426378
mmu-miR-497a-5p	8173.84	10526	12191.3	4412.11	2973.57	6156.38	3559.4	1193.69	-1.73155	0.000149495
mmu-miR-302c-5p	16316.8	15623.3	17737.3	8126.97	4664.43	4514.68	7118.79	3504.05	-1.80294	2.62419e-05
mmu-miR-124-3p	4388.22	7496.02	8072.86	5326.54	1792.89	3768.45	2868.11	1193.69	-1.80834	8.58535e-05
mmu-miR-195a-5p	5253.51	7338.21	6415.62	3223.36	1880.35	3955.01	1691.45	770.121	-1.82137	0.000104683
mmu-miR-302d-3p	910340	964083	1.03907e+06	420054	273991	333825	344144	169927	-1.85151	6.95749e-07
mmu-miR-302a-3p	213385	238658	247404	123025	63873.5	97345.4	83778.2	40450.6	-1.85309	3.9475e-07
mmu-miR-302b-3p	97576.1	101173	107622	76709	28190.6	43934.2	36726.5	19657.3	-1.94508	9.70516e-07
mmu-miR-195a-3p	1746.02	1767.48	2198.7	902.997	728.817	447.737	529.497	327.302	-1.95317	0.000116111
mmu-miR-450b-3p	19020.8	22614.3	20165.7	7669.76	3819	7014.54	5692.09	3196	-2.08603	2.46165e-06
mmu-miR-302a-5p	253219	215964	398162	158276	69558.3	58840.1	114783	48132.6	-2.1	4.00906e-05
mmu-miR-450a-5p	2611.3	3487.62	2543.28	857.276	699.664	876.818	397.123	404.314	-2.22222	5.54402e-05
mmu-miR-224-5p	2472.24	3172	2379.2	2354.65	539.325	690.261	838.37	577.591	-2.27635	2.73243e-05
mmu-miR-302b-5p	1282.47	1088.9	1542.37	468.644	349.832	223.868	191.207	154.024	-2.47883	5.68228e-05
mmu-miR-450b-5p	12871.1	19000.4	13536.8	3234.79	2303.06	5671.33	2309.2	770.121	-2.48442	0.000154311
mmu-miR-449a-5p	772.574	694.368	1263.43	262.898	204.069	111.934	88.2495	154.024	-2.52845	0.000459808
mmu-miR-7090-5p	10290.7	6154.63	14521.3	6355.27	1647.13	1044.72	1397.28	962.652	-3.16261	5.154e-06
mmu-miR-125b-1-3p	5840.66	1625.45	8401.02	6115.23	145.763	261.18	308.873	385.061	-4.60405	4.28124e-05

## Sheet: non-diff
miRNAs	WT_replicate1	WT_replicate2	WT_replicate3	WT_replicate4	CLIP_deletion_replicate1	CLIP_deletion_replicate2	CLIP_deletion_replicate3	CLIP_deletion_replicate4	fold change	P-value
mmu-miR-147-3p	8235.64	14471.3	2658.14	1120.17	38379.5	84846.1	38653.3	9838.3	2.40066	0.00262282
mmu-miR-346-5p	494.448	710.15	229.715	1028.73	2346.79	4551.99	3397.61	2964.97	1.93903	0.0054809
mmu-let-7f-2-3p	849.832	2004.2	459.431	148.594	3352.56	8600.28	2029.74	712.362	1.76239	0.0220049
mmu-miR-297a-5p	11882.2	18747.9	9024.53	3909.18	38219.2	109919	33196.5	10916.5	1.74533	0.00283474
mmu-miR-1247-3p	1267.02	1483.42	590.697	228.607	5320.36	4738.55	2265.07	1578.75	1.73306	0.00347571
mmu-miR-12199-3p	216.321	599.682	557.88	137.164	1457.63	1884.23	1191.37	1078.17	1.70581	0.0011737
mmu-miR-5114	772.574	931.085	246.124	468.644	3993.92	2686.42	1485.53	1424.72	1.68099	0.00417041
mmu-miR-669k-5p	4836.32	7054.15	2116.66	960.149	14984.5	27498.5	10339.9	5179.07	1.66189	0.00427528
mmu-miR-297b-5p	3322.07	7716.96	2182.3	902.997	12841.8	32647.5	6398.09	2329.62	1.57895	0.0255583
mmu-miR-7666-3p	139.063	205.154	98.4495	274.328	510.172	298.491	853.078	885.639	1.53759	0.0343249
mmu-miR-505-5p	1406.09	1041.55	590.697	925.858	3294.25	3078.19	3574.1	3696.58	1.51933	0.00350804
mmu-miR-467a-5p	9379.05	11488.6	8762	4640.72	20465.2	69679	25518.8	11147.5	1.46058	0.00120142
mmu-let-7e-3p	3770.16	3882.15	1476.74	811.554	9081.06	9738.27	8133.66	4794	1.45607	0.00216728
mmu-miR-3098-3p	92.7089	252.498	98.4495	68.5821	306.103	522.36	485.372	288.795	1.41396	0.00332573
mmu-miR-669b-5p	46230.9	65365.3	30732.6	13064.9	138257	244147	93765.1	37447.1	1.38659	0.00446599
mmu-miR-466h-3p	309.03	473.433	98.4495	605.808	1268.14	1193.96	1294.33	1328.46	1.36844	0.0463967
mmu-miR-669e-5p	2951.23	4008.4	2461.24	822.985	8133.6	14849.9	6677.55	2637.67	1.32793	0.00427267
mmu-miR-7224-3p	571.705	299.841	393.798	297.189	1326.45	914.129	1941.49	731.615	1.31808	0.00696855
mmu-miR-466n-3p	324.481	394.528	328.165	125.734	918.309	1772.29	794.245	288.795	1.30907	0.00570854
mmu-miR-211-3p	1962.34	3045.75	1197.8	1497.38	4737.31	3899.04	6324.55	6122.46	1.2807	0.00851986
mmu-miR-218-5p	35028.5	79126.4	27336.1	6023.79	99789.6	230472	86646.3	24586.1	1.27976	0.040076
mmu-miR-8103	1560.6	1941.08	1476.74	1611.68	5626.47	3413.99	5486.18	4639.98	1.27071	0.00521901
mmu-miR-466m-3p	1205.22	1215.14	951.678	2137.47	5728.5	5559.4	4206.56	3118.99	1.25295	0.0173815
mmu-miR-6975-3p	92.7089	157.811	213.307	160.025	670.512	503.704	338.29	346.555	1.22791	0.0156916
mmu-miR-466c-5p	8421.06	11962.1	4922.47	2331.79	17068.9	44997.5	14605.3	6411.26	1.22764	0.0139982
mmu-miR-1843a-3p	679.865	1009.99	754.779	754.403	1647.13	2705.08	2220.95	2464.39	1.22616	0.0060533
mmu-miR-669p-3p	448.093	331.403	229.715	948.719	2011.53	3096.85	1279.62	866.386	1.21574	0.0681733
mmu-miR-3069-3p	92.7089	142.03	82.0412	114.303	276.95	578.327	279.457	211.783	1.2117	0.00955792
mmu-miR-669n	370.836	378.746	262.532	240.037	830.851	970.096	1220.78	596.844	1.20791	0.00259633
mmu-miR-365-2-5p	803.477	662.806	360.981	331.48	1428.48	895.473	2353.32	1155.18	1.20573	0.0150235
mmu-miR-669d-5p	43990.4	62903.5	28402.7	12150.5	92049.6	217843	84616.6	31863.8	1.18084	0.0117761
mmu-miR-669f-3p	2116.85	2382.95	1476.74	3474.82	5874.27	13767.9	7663	3850.61	1.14202	0.0231799
mmu-miR-211-5p	24768.7	41094	15276.1	15088.1	62299.3	87644.5	54332.3	46476.8	1.11844	0.00137431
mmu-miR-669b-3p	571.705	536.557	147.674	491.505	1413.9	3152.81	750.121	365.808	1.11673	0.0813081
mmu-miR-218-1-3p	154.515	552.339	229.715	148.594	612.206	671.605	779.537	577.591	1.11491	0.0176801
mmu-miR-1249-3p	1081.6	1341.39	1230.62	925.858	2769.5	3488.62	2279.78	3176.75	1.11364	0.00629245
mmu-miR-669m-3p	432.642	299.841	295.348	217.177	903.733	1996.16	529.497	308.048	1.10934	0.0252713
mmu-miR-466k	13921.8	20641.7	6185.91	2228.92	34400.2	64884.5	14105.2	4408.94	1.10393	0.105012
mmu-miR-1199-3p	231.772	504.995	721.963	148.594	1268.14	802.195	1191.37	616.097	1.07595	0.0297785
mmu-miR-6902-3p	108.16	189.373	114.858	102.873	247.798	559.671	279.457	269.542	1.07086	0.0120975
mmu-miR-1933-5p	123.612	126.249	328.165	114.303	612.206	223.868	485.372	365.808	1.06705	0.0574885
mmu-miR-29a-3p	16965.7	29778.9	17425.6	7429.72	32446.9	83614.8	53199.7	16884.9	1.03609	0.00666625
mmu-miR-6920-5p	231.772	126.249	147.674	68.5821	131.187	615.638	411.831	288.795	1.02918	0.0479164
mmu-miR-669a-3-3p	154.515	394.528	98.4495	262.898	612.206	1772.29	279.457	115.518	0.998013	0.164834
mmu-miR-467d-3p	355.384	315.622	196.899	811.554	1268.14	2182.72	1117.83	654.603	0.972439	0.122476
mmu-miR-7089-3p	77.2574	142.03	114.858	102.873	160.34	242.524	617.746	115.518	0.971928	0.0758273
mmu-miR-5123	509.899	773.274	475.839	137.164	1166.11	1455.14	1397.28	423.567	0.964656	0.0280559
mmu-miR-877-5p	2595.85	2540.76	2444.83	4892.19	6588.51	6604.12	9825.11	8760.13	0.949191	0.0779324
mmu-miR-1953	92.7089	252.498	114.858	57.1517	204.069	261.18	647.163	96.2652	0.946268	0.0918966
mmu-miR-193a-3p	278.127	268.279	147.674	125.734	276.95	1063.37	426.539	288.795	0.937174	0.0390304
mmu-miR-1187	5840.66	4245.12	4003.61	8149.84	15276	13264.2	17149.8	12013.9	0.932897	0.0518266
mmu-miR-328-3p	4388.22	5460.26	4725.57	3909.18	10232.6	7313.03	11737.2	11340	0.92429	0.0204463
mmu-miR-3473d	695.317	931.085	869.637	377.201	1676.28	1585.73	1779.7	1212.94	0.8994	0.0088005
mmu-miR-700-3p	3136.65	4734.33	3068.34	1897.44	5947.15	12368.7	7339.42	4274.17	0.891023	0.00286323
mmu-miR-702-3p	803.477	804.836	607.105	960.149	1822.04	1231.28	2162.11	1963.81	0.872317	0.0765127
mmu-miR-3057-5p	2518.59	2351.38	2313.56	2320.36	6646.81	4477.37	6059.8	4447.45	0.868813	0.0214142
mmu-miR-6546-5p	200.869	299.841	164.082	137.164	335.256	559.671	661.871	269.542	0.867514	0.0237283
mmu-miR-6927-5p	139.063	173.592	213.307	262.898	422.714	429.081	632.455	404.314	0.858699	0.082549
mmu-miR-29b-1-5p	401.739	710.15	393.798	365.771	918.309	1511.11	1117.83	712.362	0.856236	0.0151005
mmu-miR-7075-3p	633.511	694.368	754.779	1063.02	2201.03	1679.01	1176.66	2098.58	0.854889	0.104819
mmu-miR-709	2333.17	2335.6	1608.01	4240.66	6034.6	4869.14	5118.47	8009.26	0.841085	0.148579
mmu-miR-3063-3p	1885.08	1357.17	1772.09	1463.08	3906.46	4066.94	4000.64	2676.17	0.823754	0.0176712
mmu-miR-34b-3p	525.351	725.931	820.412	434.353	1107.8	1585.73	1676.74	1039.66	0.822304	0.0169975
mmu-miR-7070-3p	432.642	583.901	278.94	605.808	816.275	839.506	1456.12	1097.42	0.814379	0.113895
mmu-miR-181b-5p	1854.18	1467.64	1132.17	194.316	2652.89	2331.96	2559.24	1540.24	0.802956	0.104117
mmu-miR-365-3p	1792.37	2067.32	2034.62	1531.67	3177.64	7947.33	3485.86	2599.16	0.801795	0.0187339
mmu-miR-181a-5p	1684.21	2446.07	1361.88	514.365	3279.68	3600.55	3456.44	1771.28	0.793423	0.0260855
mmu-miR-6900-3p	77.2574	205.154	164.082	251.468	481.019	223.868	573.622	308.048	0.791053	0.177478
mmu-miR-465a-5p	417.19	299.841	180.491	148.594	276.95	1585.73	485.372	192.53	0.788104	0.152714
mmu-miR-1930-5p	618.06	978.428	475.839	491.505	889.157	1492.46	1676.74	1174.43	0.767846	0.0464951
mmu-miR-672-5p	567270	619566	543474	556326	1.1915e+06	1.34994e+06	1.2304e+06	1.0619e+06	0.755166	0.0103541
mmu-miR-455-3p	2688.56	3077.31	2362.79	1657.4	3731.54	5279.56	5456.76	4794	0.74984	0.0226454
mmu-miR-1247-5p	185.418	315.622	328.165	811.554	845.428	1119.34	1191.37	866.386	0.744982	0.234894
mmu-miR-3074-5p	540.802	394.528	213.307	205.746	918.309	652.949	764.829	423.567	0.743391	0.0734558
mmu-miR-499-5p	12979.2	28642.7	7350.89	2743.28	21864.5	59381.1	20473.9	6141.72	0.73791	0.201674
mmu-miR-8114	417.19	678.587	1050.13	800.124	1545.09	932.785	1147.24	2021.57	0.737358	0.187797
mmu-miR-152-3p	30733	115944	24973.3	11281.7	56818.6	221201	73673.6	26665.4	0.736317	0.214983
mmu-miR-935	231.772	457.652	295.348	674.39	932.886	858.162	779.537	1020.41	0.724732	0.206434
mmu-miR-139-5p	339.933	1041.55	557.88	525.796	991.191	1940.19	1206.08	943.398	0.716419	0.0735543
mmu-miR-291b-5p	1066.15	946.866	968.086	1223.05	1574.24	2294.65	3015.19	2040.82	0.716227	0.0922628
mmu-miR-298-5p	261516	336500	219821	148320	573973	465105	536322	312977	0.705922	0.00416791
mmu-miR-146a-5p	13798.2	12814.3	18163.9	7566.89	33073.7	34214.5	22106.5	15575.7	0.695137	0.0131162
mmu-miR-504-5p	1050.7	1246.71	1329.07	2183.2	3090.18	1361.87	4471.31	3118.99	0.682909	0.237664
mmu-miR-1199-5p	1081.6	1025.77	1132.17	1074.45	2215.6	2443.9	2971.07	1424.72	0.678095	0.0512424
mmu-miR-212-3p	463.545	362.965	623.513	331.48	772.546	1287.24	1073.7	539.085	0.666866	0.0585668
mmu-miR-1951	92.7089	126.249	278.94	205.746	378.985	261.18	411.831	346.555	0.665388	0.217062
mmu-miR-878-3p	417.19	647.025	590.697	548.656	874.58	2331.96	617.746	847.133	0.659888	0.134052
mmu-miR-3062-5p	1576.05	2130.45	1164.99	765.833	2769.5	3656.52	2882.82	1520.99	0.649053	0.0290891
mmu-miR-466d-3p	463.545	394.528	278.94	1257.34	1268.14	2033.47	1809.11	847.133	0.648588	0.308747
mmu-miR-701-3p	200.869	236.717	196.899	57.1517	160.34	839.506	308.873	115.518	0.641686	0.214031
mmu-miR-3074-1-3p	757.123	678.587	607.105	308.619	947.462	1026.06	1088.41	1078.17	0.638429	0.0832116
mmu-miR-877-3p	1205.22	1909.51	1329.07	1657.4	3163.07	3134.16	2735.73	2733.93	0.625179	0.100579
mmu-miR-676-3p	12685.7	17154.1	13848.6	11076	30537.4	29811.8	26430.7	17404.7	0.604872	0.0145377
mmu-miR-1839-3p	1452.44	2477.63	1247.03	502.935	2171.87	4309.47	2882.82	1155.18	0.600491	0.100652
mmu-miR-2137	401.739	426.09	295.348	1074.45	670.512	820.851	750.121	1925.3	0.597828	0.42667
mmu-miR-361-5p	209553	233150	213356	121596	352062	401321	409051	251137	0.583546	0.00398782
mmu-miR-205-5p	55254.5	70557.3	33899.4	14756.6	66118.3	122661	79071.5	43723.6	0.577912	0.0669743
mmu-miR-190b-5p	2101.4	2572.32	1968.99	914.427	4008.49	5260.91	3706.48	1270.7	0.572735	0.0755821
mmu-miR-671-5p	1915.98	1909.51	1542.37	1531.67	3542.05	3544.58	3647.65	2252.6	0.568959	0.0618658
mmu-miR-744-3p	1699.66	2698.57	1493.15	514.365	2055.26	5466.12	3294.65	1058.92	0.566563	0.163663
mmu-miR-676-5p	3847.42	4039.96	3560.59	1943.16	5961.72	9309.19	7089.38	2945.71	0.566051	0.0289491
mmu-miR-129-2-3p	123.612	331.403	393.798	457.214	364.408	503.704	867.787	712.362	0.564666	0.344512
mmu-miR-27b-3p	556717	853947	497843	200843	897276	1.5274e+06	1.00356e+06	401946	0.560215	0.0480691
mmu-miR-126b-3p	92.7089	189.373	164.082	57.1517	320.679	111.934	235.332	154.024	0.550535	0.24691
mmu-miR-1843b-5p	154.515	362.965	131.266	57.1517	364.408	429.081	352.998	96.2652	0.548806	0.244121
mmu-miR-128-3p	126548	139647	130856	76926.2	200381	232637	273426	140316	0.541585	0.0100058
mmu-miR-29b-2-5p	370.836	142.03	311.757	240.037	408.138	541.015	426.539	519.832	0.53726	0.253103
mmu-miR-615-3p	1328.83	1341.39	1657.23	1497.38	2419.67	2593.14	3456.44	2252.6	0.535292	0.139562
mmu-miR-1954	262.675	173.592	262.532	125.734	466.443	429.081	544.205	115.518	0.529894	0.211965
mmu-miR-7023-3p	1174.31	789.055	1017.31	1005.87	1282.72	634.294	1735.57	2676.17	0.528485	0.38027
mmu-miR-6948-5p	108.16	189.373	114.858	68.5821	102.034	223.868	279.457	192.53	0.52774	0.218414
mmu-miR-193a-5p	664.414	599.682	541.472	560.087	903.733	1287.24	1029.58	1020.41	0.527657	0.148362
mmu-miR-425-3p	22219.2	25833.7	21429.2	15305.2	43947.7	46340.8	42992.2	21043.6	0.524229	0.0172607
mmu-miR-1934-5p	1606.95	1436.08	1690.05	708.681	2084.42	1529.77	2985.77	2156.34	0.513401	0.177329
mmu-miR-712-5p	741.671	394.528	869.637	594.378	1093.23	727.572	1323.74	1251.45	0.508583	0.288406
mmu-miR-196a-5p	428748	546452	401559	194099	747169	891369	720160	366520	0.507988	0.0124657
mmu-miR-1839-5p	56289.8	100526	56592	29067.4	106189	158107	104046	53330.9	0.507177	0.0383036
mmu-miR-672-3p	1962.34	1751.7	3068.34	1565.96	3323.41	4402.74	4250.68	2791.69	0.503069	0.109988
mmu-miR-7079-3p	726.22	1388.74	1000.9	205.746	1472.21	2630.45	1220.78	462.073	0.500434	0.270159
mmu-miR-6967-3p	602.608	583.901	393.798	377.201	1020.34	1138	808.954	519.832	0.484501	0.133753
mmu-miR-34a-3p	741.671	1152.02	754.779	457.214	787.122	2947.6	1809.11	346.555	0.47435	0.291491
mmu-miR-342-3p	8668.28	10857.4	8253.35	7864.08	12696	23282.3	14164	12302.7	0.460848	0.0832712
mmu-miR-99b-3p	49692	51635.8	42710.7	24163.7	83026.8	79174.8	77733.1	42298.9	0.460507	0.029969
mmu-miR-5100	1514.25	1988.42	1066.54	2308.93	1676.28	4346.78	3029.9	3311.52	0.456752	0.344137
mmu-miR-5099	1.68412e+06	1.56037e+06	2.13553e+06	2.17665e+06	3.44284e+06	2.78725e+06	3.68489e+06	3.12556e+06	0.448639	0.212212
mmu-miR-324-5p	21771.1	37559	16129.3	9132.84	38539.8	49642.8	34358.5	16673.1	0.445984	0.121556
mmu-miR-187-5p	77.2574	142.03	246.124	102.873	160.34	410.425	176.499	211.783	0.442338	0.340777
mmu-miR-330-3p	3383.88	4276.68	2608.91	1668.83	4824.77	5689.99	4294.81	4062.39	0.440067	0.112374
mmu-miR-878-5p	3059.39	4103.09	2559.69	1554.53	3673.24	9980.8	4486.02	1963.81	0.439539	0.182768
mmu-miR-1306-3p	1545.15	1909.51	1460.33	2331.79	2784.08	3227.44	3927.1	2849.45	0.432036	0.287632
mmu-miR-12189-3p	185.418	189.373	131.266	57.1517	160.34	373.114	294.165	115.518	0.427753	0.263063
mmu-miR-196a-1-3p	2070.5	2256.7	1673.64	1691.69	3323.41	4496.02	3956.52	1809.78	0.424941	0.135227
mmu-miR-34c-5p	6458.72	7953.67	6514.07	2743.28	8716.65	16137.2	11987.2	3658.08	0.421538	0.144188
mmu-miR-320-3p	53524	48369.1	51833.6	66776.1	86700.1	83409.6	107223	96361.4	0.421008	0.268683
mmu-miR-194-5p	22605.5	26117.7	21757.3	10687.4	28540.5	61265.3	34270.2	15556.4	0.418959	0.0912333
mmu-miR-7667-3p	154.515	126.249	295.348	274.328	306.103	261.18	558.913	346.555	0.416943	0.438182
mmu-miR-24-3p	355647	449840	347297	141210	513233	766488	561370	269600	0.412835	0.0521043
mmu-miR-291b-3p	10831.5	14408.1	10238.7	6949.65	15188.5	25558.3	20091.5	10165.6	0.407728	0.0513924
mmu-miR-466i-3p	216.321	94.6866	98.4495	228.607	393.561	317.147	117.666	288.795	0.406793	0.507789
mmu-miR-7654-5p	108.16	268.279	213.307	102.873	291.527	410.425	308.873	134.771	0.401303	0.266788
mmu-miR-6967-5p	200.869	299.841	360.981	114.303	291.527	410.425	647.163	211.783	0.399387	0.304237
mmu-miR-491-5p	231.772	568.12	246.124	365.771	583.054	970.096	779.537	231.036	0.398417	0.354086
mmu-miR-296-5p	17213	20515.4	21905	8652.77	20829.6	25726.2	31505.1	24528.4	0.398389	0.153924
mmu-miR-6927-3p	339.933	157.811	114.858	205.746	451.867	93.2785	411.831	327.302	0.390447	0.536259
mmu-miR-6516-3p	309.03	362.965	311.757	777.263	553.901	596.982	691.288	1097.42	0.384172	0.545145
mmu-miR-743b-5p	463.545	378.746	180.491	80.0124	349.832	615.638	367.706	327.302	0.383425	0.38856
mmu-miR-339-3p	309.03	489.214	213.307	91.4427	495.596	671.605	367.706	192.53	0.381238	0.345542
mmu-miR-7b-5p	4558.19	3787.46	3987.2	1371.64	6603.08	7928.67	5750.93	2098.58	0.381047	0.236327
mmu-miR-1194	448.093	394.528	1230.62	388.632	816.275	932.785	1353.16	770.121	0.377117	0.40088
mmu-miR-15a-3p	1421.54	4213.55	1247.03	502.935	2142.72	7014.54	2265.07	712.362	0.374639	0.502511
mmu-miR-99b-5p	688889	771822	677398	663886	1.05836e+06	1.23766e+06	1.3301e+06	937950	0.373237	0.131796
mmu-miR-455-5p	1127.96	1136.24	738.371	262.898	976.615	2518.52	1426.7	462.073	0.372563	0.367594
mmu-miR-1968-5p	9023.67	12388.2	11518.6	7452.58	17622.8	19401.9	19032.5	9703.53	0.37246	0.083681
mmu-miR-339-5p	11233.2	16286.1	13126.6	6481	16806.5	27517.2	21577	9953.82	0.367792	0.08195
mmu-miR-125a-5p	92338.1	101851	91197	45549.9	119774	133146	134933	108645	0.367259	0.0975741
mmu-miR-187-3p	6891.36	8916.32	7679.06	4457.83	10072.3	16622.2	12590.3	6276.49	0.364902	0.0806928
mmu-miR-7058-3p	139.063	268.279	262.532	537.226	699.664	298.491	470.664	577.591	0.363863	0.571544
mmu-miR-30c-5p	447228	529645	477349	248839	542196	953213	751989	450444	0.362938	0.039381
mmu-miR-132-5p	463.545	394.528	639.922	240.037	568.477	839.506	970.744	404.314	0.362774	0.286527
mmu-miR-652-3p	16672.2	25833.7	16063.7	14665.1	23948.9	51116.6	29681.2	17866.8	0.361873	0.139868
mmu-miR-107-3p	75047.9	120347	67733.2	22357.8	116888	149413	111062	55025.2	0.361338	0.214587
mmu-miR-192-5p	55470.8	75812.4	56083.4	24300.9	88667.9	133108	89779.2	30631.6	0.35356	0.179947
mmu-miR-702-5p	339.933	252.498	147.674	365.771	481.019	167.901	720.704	423.567	0.350707	0.559624
mmu-miR-301a-3p	32092.7	84397.3	34211.2	14916.6	46032.1	158872	48949.1	18001.6	0.341977	0.463638
mmu-miR-1843b-3p	432.642	410.309	344.573	502.935	335.256	541.015	823.662	866.386	0.331581	0.526539
mmu-miR-1668	169.966	110.468	164.082	114.303	247.798	223.868	294.165	134.771	0.331027	0.374921
mmu-miR-3072-3p	7803	14913.1	9188.62	10264.4	13876.7	26024.7	14208.2	13515.6	0.32421	0.286716
mmu-miR-5128	726.22	536.557	1443.93	1680.26	1836.62	839.506	2147.4	2156.34	0.321955	0.609422
mmu-miR-377-3p	1823.28	1483.42	1772.09	582.948	1705.43	3805.76	2059.15	1251.45	0.321161	0.318629
mmu-miR-598-3p	7385.81	10178.8	6989.91	4286.38	12054.6	12107.5	12649.1	6719.31	0.31701	0.143039
mmu-miR-6412	4867.22	5018.39	5824.93	2857.59	5276.64	6342.94	9398.57	6064.7	0.312111	0.286935
mmu-miR-185-3p	478.996	789.055	557.88	217.177	772.546	783.539	1073.7	385.061	0.310807	0.358959
mmu-miR-3473g	92.7089	110.468	229.715	194.316	189.492	149.246	294.165	308.048	0.309601	0.592729
mmu-miR-574-3p	1035.25	1546.55	1214.21	594.378	1443.06	1734.98	1809.11	1328.46	0.308785	0.285972
mmu-miR-15a-5p	38845	65538.9	34752.7	12596.2	48553.8	126299	48360.7	16442.1	0.298199	0.460198
mmu-miR-6911-3p	494.448	741.712	196.899	137.164	685.088	615.638	352.998	462.073	0.295787	0.529571
mmu-miR-871-3p	5933.37	8916.32	8450.25	6583.88	8556.31	20222.8	9957.48	8606.1	0.285097	0.31665
mmu-miR-470-5p	22172.9	26291.3	22430.1	25009.6	33540.2	55780.5	32946.5	30285	0.285034	0.313292
mmu-miR-12178-5p	432.642	299.841	426.614	262.898	320.679	988.752	205.915	596.844	0.282858	0.577088
mmu-miR-6960-3p	293.578	347.184	147.674	377.201	145.763	242.524	647.163	635.35	0.282363	0.674399
mmu-miR-6364	3337.52	4529.18	2510.46	1703.12	3702.39	7536.9	3691.77	3080.48	0.279251	0.312503
mmu-miR-6539	17182.1	17138.3	17146.6	9372.88	28380.1	30949.8	24062.7	10435.1	0.274477	0.224357
mmu-miR-700-5p	7246.75	9326.63	5742.89	7761.2	10072.3	16361	13325.7	8144.03	0.273709	0.335854
mmu-miR-23b-5p	169.966	583.901	278.94	262.898	320.679	895.473	382.414	365.808	0.265731	0.537622
mmu-miR-150-3p	602.608	252.498	1115.76	834.415	1151.53	298.491	1823.82	981.905	0.263479	0.696094
mmu-miR-3102-5p.2-5p	139.063	189.373	311.757	400.062	626.783	298.491	470.664	308.048	0.263231	0.636121
mmu-miR-205-3p	788.026	899.523	278.94	114.303	874.58	1473.8	411.831	288.795	0.262878	0.632603
mmu-miR-1968-3p	231.772	331.403	246.124	228.607	306.103	671.605	500.08	192.53	0.254251	0.464157
mmu-miR-185-5p	17444.7	22030.4	16654.4	9818.67	24808.9	34792.9	21900.6	14844.1	0.240368	0.207634
mmu-miR-132-3p	1915.98	1893.73	2264.34	1817.42	2842.39	3787.11	3309.36	2098.58	0.238235	0.40147
mmu-miR-3098-5p	231.772	205.154	196.899	125.734	393.561	242.524	367.706	115.518	0.224912	0.556262
mmu-miR-7068-3p	1236.12	1672.8	1919.76	1280.2	1953.23	2257.34	2603.36	1906.05	0.224364	0.473839
mmu-miR-871-5p	9842.6	12498.6	11994.4	3657.71	11500.7	23431.6	12178.4	7373.91	0.221755	0.406942
mmu-miR-881-3p	6814.11	11125.7	7137.59	2251.78	9270.55	23338.3	6986.42	2060.07	0.214623	0.648968
mmu-miR-143-5p	509.899	710.15	1214.21	171.455	1064.07	1138	970.744	423.567	0.213921	0.622004
mmu-miR-3060-3p	927.089	631.244	459.431	491.505	903.733	820.851	1103.12	731.615	0.21384	0.556688
mmu-miR-186-5p	515292	653622	526606	184726	736120	955078	686963	294129	0.213348	0.36164
mmu-miR-3076-3p	741.671	694.368	754.779	365.771	1034.92	932.785	911.911	654.603	0.211919	0.475059
mmu-miR-463-5p	3631.1	4324.02	4955.29	1988.88	5626.47	9980.8	4574.27	2233.35	0.211624	0.469755
mmu-miR-690	3322.07	3929.49	3068.34	2080.32	3877.31	5801.92	4706.64	3234.51	0.210675	0.357197
mmu-miR-1955-5p	185.418	220.935	180.491	274.328	422.714	186.557	588.33	154.024	0.208375	0.68735
mmu-miR-431-3p	2719.46	3882.15	3051.93	1280.2	5101.72	4477.37	3500.56	2040.82	0.206851	0.455309
mmu-miR-743b-3p	2904.88	2998.41	1952.58	1383.07	2915.27	6212.35	3294.65	1482.48	0.200596	0.498364
mmu-miR-7073-5p	108.16	347.184	229.715	102.873	262.374	205.213	338.29	211.783	0.19934	0.632574
mmu-miR-741-5p	339.933	299.841	607.105	114.303	437.29	596.982	470.664	327.302	0.193466	0.625586
mmu-miR-1188-5p	1390.63	1199.36	1870.54	2594.69	2317.64	988.752	3368.19	3311.52	0.192797	0.751147
mmu-miR-6960-5p	463.545	631.244	623.513	468.644	976.615	802.195	867.787	500.579	0.190558	0.550132
mmu-miR-501-5p	803.477	694.368	623.513	422.923	626.783	1529.77	897.203	635.35	0.189996	0.542979
mmu-miR-6937-5p	169.966	78.9055	311.757	148.594	262.374	205.213	191.207	288.795	0.18783	0.726247
mmu-miR-423-3p	77396.5	85722.9	77512.5	67713.4	120226	110833	128035	79611.3	0.181849	0.424507
mmu-miR-324-3p	8096.58	10052.6	6743.79	8709.92	12579.4	9999.45	14502.3	10338.9	0.181596	0.577126
mmu-miR-1946a	957.992	1073.11	853.229	777.263	1763.74	1044.72	1029.58	1116.68	0.178861	0.623691
mmu-miR-191-5p	996559	1.09429e+06	1.12201e+06	746081	1.44126e+06	1.33922e+06	1.62441e+06	1.04935e+06	0.175016	0.383724
mmu-miR-3064-5p	278.127	504.995	196.899	194.316	378.985	541.015	455.956	250.289	0.172154	0.608846
mmu-miR-671-3p	1699.66	1467.64	1066.54	1405.93	1822.04	951.441	2323.9	2291.11	0.171312	0.72054
mmu-miR-340-3p	942.541	1325.61	1132.17	274.328	1064.07	1604.39	1382.58	750.868	0.16439	0.626801
mmu-miR-497b	200.869	583.901	344.573	182.885	583.054	503.704	441.247	231.036	0.161404	0.659723
mmu-miR-7652-3p	231.772	110.468	311.757	160.025	306.103	317.147	250.04	250.289	0.160924	0.707081
mmu-miR-152-5p	1267.02	5144.64	574.289	114.303	2332.21	6454.87	647.163	308.048	0.160289	0.865554
mmu-miR-196b-5p	4542.74	5286.67	5562.39	1714.55	5582.74	9402.47	5147.89	3253.76	0.159435	0.550746
mmu-miR-3082-3p	339.933	631.244	311.757	240.037	539.325	895.473	514.789	231.036	0.15901	0.637138
mmu-miR-151-5p	60214.4	70620.4	62876.4	50533.5	74791.2	110889	101296	59491.9	0.157569	0.423832
mmu-miR-7667-5p	324.481	236.717	229.715	217.177	291.527	485.048	426.539	250.289	0.155015	0.647294
mmu-miR-128-1-5p	1297.92	1562.33	1575.19	1520.24	2230.18	1529.77	2794.57	1675.01	0.143279	0.696298
mmu-miR-1291	1915.98	1388.74	1870.54	2091.75	2886.12	2443.9	1691.45	2849.45	0.136685	0.756526
mmu-miR-16-5p	2.57207e+06	3.45635e+06	2.6861e+06	1.24706e+06	2.74671e+06	5.39629e+06	3.7645e+06	1.76964e+06	0.136475	0.453465
mmu-miR-151-3p	17861.9	20752.1	20986.1	29924.6	28190.6	27144	40624.2	31093.6	0.13172	0.744599
mmu-miR-667-3p	3940.13	4402.93	4397.41	4972.2	4256.29	6398.9	6589.3	6796.32	0.131449	0.73002
mmu-miR-1191a	14014.5	15812.7	13832.2	8584.19	19197	21211.5	18694.2	11417	0.130538	0.479167
mmu-miR-7237-3p	2132.31	1956.86	1197.8	1588.82	2375.94	3637.86	1838.53	1829.04	0.125486	0.705027
mmu-miR-485-3p	85570.3	73271.7	90032	54957.1	78960	103315	108194	100944	0.124421	0.646263
mmu-miR-7042-5p	77.2574	110.468	196.899	91.4427	102.034	93.2785	352.998	96.2652	0.118063	0.827179
mmu-miR-467g	231.772	394.528	295.348	171.455	422.714	522.36	470.664	115.518	0.111544	0.759284
mmu-miR-106b-5p	105225	157937	106276	58123.3	118520	288865	142141	54678.6	0.108386	0.689609
mmu-miR-484	101640	123203	97908	75474.6	119686	165028	149333	96149.6	0.098599	0.582329
mmu-miR-106b-3p	267249	334023	296185	202717	378271	350335	444733	261995	0.0972875	0.621828
mmu-miR-191-3p	5222.6	4781.67	4922.47	4686.44	6836.3	6995.89	8368.99	4659.23	0.0900615	0.740744
mmu-miR-93-3p	6288.76	6880.56	6284.36	4812.17	6938.34	11044.2	9207.36	5564.13	0.0854115	0.690899
mmu-miR-342-5p	6705.95	7559.15	6743.79	5623.73	9460.04	8077.92	8824.95	7739.72	0.0848523	0.755231
mmu-miR-465b-5p	27905.4	33487.5	31159.3	18220	34822.9	64156.9	32990.6	19599.6	0.0800457	0.695689
mmu-miR-15b-3p	17274.8	18227.2	17474.8	8801.36	19488.6	25782.2	22959.6	12129.4	0.0766044	0.67258
mmu-miR-301b-5p	602.608	1278.27	1214.21	285.759	1151.53	2126.75	750.121	404.314	0.0665546	0.875448
mmu-miR-143-3p	64000.1	97890.2	65633	18791.5	84950.9	161372	62598.3	19984.6	0.0655772	0.87197
mmu-miR-425-5p	116242	179968	136878	71348.2	143519	202396	178588	109588	0.0627763	0.710988
mmu-miR-103-3p	521380	805073	532710	239889	726222	925453	664313	339392	0.057814	0.767993
mmu-miR-3084-3p	1297.92	773.274	918.862	1748.84	932.886	1660.36	2147.4	1790.53	0.0520732	0.920973
mmu-miR-101b-5p	1452.44	1152.02	886.045	262.898	1122.38	2537.17	897.203	423.567	0.0519081	0.907907
mmu-miR-296-3p	103834	114160	120880	95592	169829	142343	169410	89507.3	0.0455049	0.843511
mmu-miR-200c-3p	155504	237332	133219	109571	208850	285749	188692	129785	0.0426568	0.819482
mmu-miR-30a-3p	92044.5	122146	103454	55082.8	120663	142903	130477	74066.4	0.0421767	0.791387
mmu-miR-743a-3p	401.739	426.09	639.922	411.492	408.138	1305.9	573.622	365.808	0.0421218	0.912623
mmu-miR-423-5p	20674.1	23782.1	23135.6	34782.5	33263.2	34475.7	37329.5	32941.9	0.0404767	0.916584
mmu-miR-361-3p	35368.5	42624.8	37903	16951.2	49588.7	45165.4	42962.8	25433.3	0.0383357	0.84741
mmu-miR-3473b	865.283	441.871	721.963	2046.03	976.615	1604.39	1441.41	1848.29	0.0372756	0.955151
mmu-miR-6952-3p	216.321	410.309	213.307	217.177	204.069	261.18	308.873	423.567	0.0366086	0.938019
mmu-miR-155-5p	12979.2	13776.9	14504.9	10195.9	14663.8	19028.8	18267.6	13111.3	0.0321467	0.884389
mmu-miR-7226-3p	309.03	299.841	295.348	205.746	335.256	615.638	382.414	173.277	0.0313771	0.92078
mmu-miR-6240	5145.35	5791.66	4495.86	6240.97	8308.51	7910.02	6398.09	5910.68	0.0258265	0.937643
mmu-miR-350-5p	5083.54	6186.19	6136.68	5818.04	5772.23	7872.7	9619.19	6507.52	0.0243431	0.936617
mmu-miR-883b-3p	602.608	536.557	705.555	148.594	378.985	1380.52	705.996	192.53	0.0242497	0.959107
mmu-miR-34a-5p	250484	331056	224580	81669.8	239693	486149	311300	99865.5	0.0232862	0.936259
mmu-miR-93-5p	1.48425e+06	2.24377e+06	1.74818e+06	516171	1.76285e+06	2.55311e+06	2.08275e+06	902601	0.0219575	0.92642
mmu-miR-138-5p	2982.14	6170.41	3494.96	1954.59	3804.42	7480.93	5427.34	1983.06	0.0208808	0.942047
mmu-miR-30e-5p	574610	931495	421971	160333	620398	1.49775e+06	436041	169484	0.0199837	0.964101
mmu-miR-150-5p	16610.3	12340.8	23250.5	19797.4	19634.3	20148.2	28298.7	23392.4	0.0186826	0.96153
mmu-miR-6406	12500.3	6817.44	11354.5	23317.9	11471.6	9290.54	22003.5	26434.4	0.0142823	0.982592
mmu-miR-101b-3p	93790.5	174176	125572	28495.8	120459	289145	109400	28764	0.0138956	0.975617
mmu-miR-3058-3p	710.768	757.493	557.88	605.808	612.206	820.851	691.288	981.905	0.0116595	0.97721
mmu-miR-465c-5p	40961.9	48653.1	42398.9	29124.5	46411.1	79398.6	45698.5	34308.9	0.0115476	0.950802
mmu-miR-770-3p	1081.6	1341.39	1361.88	1417.36	1413.9	932.785	2147.4	1790.53	0.009434	0.9834
mmu-miR-290a-5p	2889.43	3140.44	2920.67	2594.69	2317.64	6324.28	3618.23	2887.95	0.00919237	0.976208
mmu-miR-25-3p	2.7772e+06	3.31215e+06	2.87825e+06	1.71125e+06	3.26474e+06	3.99228e+06	3.751e+06	2.18104e+06	0.00796368	0.953594
mmu-miR-148b-3p	538067	635742	468505	144788	647787	852342	502213	200905	0.00098178	0.997415
mmu-miR-3544-3p	849.832	883.742	656.33	708.681	830.851	876.818	1250.2	847.133	-0.00172785	0.996044
mmu-miR-219a-2-3p	386.287	504.995	410.206	182.885	291.527	932.785	117.666	423.567	-0.00521333	0.992098
mmu-miR-1195	4913.57	2793.25	5628.03	8607.05	6690.54	3843.07	9619.19	8278.8	-0.00578029	0.991959
mmu-miR-3063-5p	185.418	110.468	98.4495	320.05	116.611	298.491	308.873	269.542	-0.0125891	0.984158
mmu-miR-345-3p	36975.4	40541.6	35556.7	22666.4	56774.8	41583.5	48463.7	20870.3	-0.0142335	0.951146
mmu-miR-137-3p	571.705	599.682	639.922	137.164	772.546	578.327	867.787	134.771	-0.0171642	0.971833
mmu-miR-3102-3p.2-3p	231.772	504.995	344.573	457.214	422.714	634.294	426.539	462.073	-0.0173472	0.967444
mmu-miR-350-3p	3183.01	3692.78	3019.12	4114.92	4416.63	8674.9	4383.06	2271.86	-0.0216478	0.95035
mmu-miR-340-5p	38304.2	64386.9	54967.6	14230.8	47387.7	105349	48257.8	14940.4	-0.0273761	0.941372
mmu-miR-706	169.966	347.184	229.715	240.037	174.916	130.59	352.998	404.314	-0.0333619	0.953088
mmu-miR-1224-5p	154.515	94.6866	196.899	331.48	174.916	93.2785	250.04	404.314	-0.0361867	0.961103
mmu-miR-708-3p	14354.4	25013	17310.7	5063.64	17972.6	38132.2	14502.3	5698.9	-0.0398145	0.916349
mmu-miR-5622-3p	77.2574	110.468	278.94	274.328	408.138	242.524	132.374	192.53	-0.0413312	0.947408
mmu-miR-301a-5p	12469.4	19458.1	11370.9	3131.91	13701.8	21752.5	13134.5	5641.14	-0.0441439	0.896308
mmu-miR-501-3p	1081.6	2256.7	1509.56	2194.63	1384.75	2518.52	2500.4	2271.86	-0.0457526	0.917092
mmu-miR-770-5p	247.224	457.652	541.472	457.214	510.172	578.327	470.664	500.579	-0.0472819	0.908934
mmu-miR-125a-3p	23733.5	18937.3	19542.2	11007.4	28088.6	17965.4	23739.1	14863.3	-0.0477299	0.85612
mmu-miR-883a-3p	2534.04	4150.43	2920.67	1417.36	2171.87	6063.1	3338.77	1829.04	-0.0487714	0.867233
mmu-miR-5616-3p	324.481	220.935	196.899	102.873	247.798	485.048	176.499	134.771	-0.0518012	0.893372
mmu-miR-30d-5p	762392	958891	840233	441051	911794	883067	1.04524e+06	610417	-0.0555035	0.748262
mmu-miR-7239-5p	92.7089	94.6866	164.082	240.037	276.95	111.934	191.207	173.277	-0.0697661	0.907301
mmu-miR-378a-5p	8498.32	8900.54	7203.22	4514.99	9634.96	9906.18	9207.36	5275.33	-0.0719289	0.723814
mmu-miR-1198-5p	53508.5	53119.2	50668.7	60969.5	57780.6	53915	76012.2	68271.2	-0.0750094	0.83364
mmu-miR-188-5p	1220.67	2319.82	1673.64	422.923	1749.16	3152.81	1309.03	481.326	-0.0791949	0.853412
mmu-miR-1943-5p	401.739	331.403	443.023	594.378	481.019	335.803	603.038	654.603	-0.0794222	0.880075
mmu-miR-331-3p	5887.02	8206.17	5972.6	7989.81	8279.36	9159.95	10707.6	6469.02	-0.0803039	0.798585
mmu-miR-351-5p	10058.9	10652.2	12486.7	6823.92	11719.4	6939.92	14678.8	10396.6	-0.0806951	0.807215
mmu-miR-5113	726.22	410.309	672.738	377.201	801.699	578.327	750.121	423.567	-0.0832217	0.816057
mmu-miR-141-5p	2966.69	5318.23	1903.36	628.669	3862.73	6436.22	1514.95	770.121	-0.0940306	0.865206
mmu-miR-412-3p	1143.41	915.304	1378.29	1280.2	976.615	1268.59	1411.99	1675.01	-0.100151	0.821521
mmu-miR-3085-3p	757.123	662.806	508.656	994.44	583.054	1940.19	1073.7	481.326	-0.101332	0.827549
mmu-miR-194-2-3p	401.739	284.06	246.124	434.353	495.596	391.77	441.247	346.555	-0.103059	0.815578
mmu-miR-298-3p	2966.69	3582.31	2510.46	1600.25	2332.21	4943.76	3074.02	2021.57	-0.103337	0.682871
mmu-miR-704	1205.22	741.712	623.513	342.91	626.783	970.096	897.203	693.109	-0.103577	0.774888
mmu-miR-666-3p	9379.05	16207.2	10484.9	4606.43	12623.1	18301.2	10692.9	5044.29	-0.110417	0.670717
mmu-miR-16-1-3p	6165.14	10983.6	6645.34	1531.67	7885.8	15092.5	4839.01	1694.27	-0.114233	0.812677
mmu-miR-673-5p	38752.3	37417	37771.8	32587.9	42315.1	42684.2	46345.7	35695.1	-0.118905	0.634946
mmu-miR-743a-5p	942.541	583.901	787.596	205.746	422.714	1361.87	1044.29	211.783	-0.120727	0.80048
mmu-miR-30a-5p	715450	1.08121e+06	684043	249079	828490	1.39106e+06	679933	255064	-0.122481	0.696071
mmu-miR-543-3p	450859	473228	523275	168929	322778	416246	486269	417733	-0.133892	0.637136
mmu-miR-141-3p	19592.5	42798.3	17638.9	7326.85	21893.7	52049.4	19311.9	6988.85	-0.143677	0.732769
mmu-miR-30e-3p	181107	221504	214439	92860.1	204040	220044	243804	112322	-0.144156	0.433782
mmu-miR-3066-3p	355.384	252.498	377.39	91.4427	233.221	373.114	264.748	250.289	-0.144285	0.714604
mmu-miR-30b-5p	30995.7	41346.5	28041.7	16459.7	25202.5	64343.5	35005.6	13765.9	-0.144892	0.582862
mmu-miR-3470a	973.444	536.557	738.371	605.808	714.241	1007.41	1132.54	519.832	-0.145462	0.675203
mmu-miR-378a-3p	4496.38	7101.5	4659.94	2800.43	6384.44	6977.23	5559.72	2522.15	-0.145809	0.54459
mmu-miR-5617-3p	169.966	173.592	213.307	137.164	320.679	130.59	205.915	115.518	-0.146533	0.726924
mmu-miR-3473c	247.224	78.9055	114.858	388.632	87.458	429.081	323.581	269.542	-0.148667	0.835828
mmu-miR-409-5p	3754.71	3771.68	3609.81	2526.11	3702.39	6100.41	4162.43	2098.58	-0.150809	0.524957
mmu-miR-26a-5p	4.44714e+06	6.62666e+06	5.21123e+06	2.4764e+06	5.21455e+06	6.66096e+06	5.71026e+06	2.95792e+06	-0.153717	0.314246
mmu-miR-493-5p	21925.7	21115.1	25104.6	12996.3	22243.5	18637	27254.4	18078.6	-0.154287	0.54616
mmu-miR-15b-5p	37655.3	52898.3	42316.9	56431.6	39283.2	82738	56494.4	47131.4	-0.158029	0.634736
mmu-miR-140-3p	125821	192782	116138	63438.4	150063	199038	138008	64728.7	-0.160394	0.444638
mmu-miR-32-5p	1158.86	1846.39	525.064	628.669	772.546	2891.63	838.37	462.073	-0.170127	0.718088
mmu-miR-33-3p	525.351	789.055	935.27	285.759	816.275	1380.52	691.288	115.518	-0.17076	0.728868
mmu-miR-301b-3p	40143	89163.2	43120.9	13430.7	41221.9	104211	41786.1	17828.3	-0.170807	0.667332
mmu-miR-184-3p	4619.99	4008.4	4331.78	4000.62	5232.91	4533.33	5059.64	3946.87	-0.174291	0.562277
mmu-miR-666-5p	15575.1	18432.3	16818.5	12744.8	19255.3	17816.2	21047.5	11994.6	-0.175109	0.431891
mmu-miR-101a-3p	28894.3	62635.2	37755.4	9235.72	30508.3	98371.5	25504.1	6738.56	-0.175612	0.746093
mmu-miR-433-3p	61867.8	63550.5	68406	56180.1	60506.4	46657.9	76159.3	74258.9	-0.183539	0.600277
mmu-miR-3544-5p	92.7089	142.03	328.165	205.746	87.458	354.458	132.374	269.542	-0.184061	0.763957
mmu-miR-27b-5p	14740.7	19252.9	13143	6846.78	18337	19719.1	12840.3	7354.66	-0.184641	0.427814
mmu-miR-874-3p	216.321	268.279	114.858	102.873	72.8817	242.524	235.332	173.277	-0.187335	0.681074
mmu-miR-130a-3p	469741	608661	519961	151601	393022	818612	490138	204910	-0.189893	0.486485
mmu-miR-708-5p	351320	459451	379949	150332	372557	506801	359911	192203	-0.191081	0.31524
mmu-miR-330-5p	12531.2	17280.3	11108.4	3886.32	14780.4	18226.6	10707.6	4370.44	-0.193837	0.547125
mmu-miR-146b-5p	210032	301277	216228	96666.4	264561	328378	190516	103793	-0.195682	0.384799
mmu-miR-291a-5p	3.3583e+06	3.56227e+06	3.65398e+06	2.29738e+06	3.06214e+06	3.79375e+06	3.60031e+06	2.97496e+06	-0.203967	0.303914
mmu-miR-148b-5p	13149.2	16917.3	11190.4	3840.6	11952.6	19737.7	11604.8	4851.76	-0.209137	0.490089
mmu-miR-92b-5p	1189.76	615.463	1082.94	1360.21	1384.75	652.949	1132.54	1366.97	-0.209917	0.696571
mmu-miR-378d	478.996	647.025	426.614	365.771	685.088	708.917	588.33	192.53	-0.210549	0.541944
mmu-miR-6236	1622.41	820.617	1460.33	1405.93	1588.82	1623.05	1235.49	1386.22	-0.21269	0.60324
mmu-miR-8117	571.705	315.622	525.064	685.821	728.817	503.704	558.913	558.338	-0.216989	0.652107
mmu-miR-145a-5p	4789.96	5507.6	4495.86	7075.38	5582.74	11958.3	5677.38	3696.58	-0.226228	0.542676
mmu-miR-6239	6551.43	4986.83	7285.26	11739	6690.54	5652.68	9207.36	11340	-0.227512	0.679353
mmu-miR-24-2-5p	5098.99	11362.4	4118.47	1394.5	5334.94	14439.5	3706.48	847.133	-0.228916	0.702354
mmu-miR-6988-3p	216.321	189.373	426.614	285.759	247.798	205.213	397.123	308.048	-0.237506	0.628884
mmu-miR-341-5p	525.351	362.965	557.88	925.858	612.206	951.441	514.789	693.109	-0.237546	0.647359
mmu-miR-574-5p	880.735	678.587	787.596	2617.55	1093.23	1324.55	1926.78	1675.01	-0.241913	0.714772
mmu-miR-23a-3p	30485.8	33787.3	36048.9	24232.3	23686.6	54997	36344.1	21775.2	-0.243003	0.291328
mmu-miR-7a-5p	2.66251e+06	2.93861e+06	2.66495e+06	889784	3.26781e+06	3.56632e+06	2.11212e+06	743687	-0.245946	0.43602
mmu-miR-429-3p	55826.2	86796.1	55131.7	25203.9	40857.5	100778	71438	24489.9	-0.246752	0.372722
mmu-miR-6392-5p	339.933	189.373	853.229	777.263	597.63	447.737	661.871	654.603	-0.250086	0.686713
mmu-miR-3470b	386.287	583.901	426.614	400.062	641.359	410.425	588.33	269.542	-0.250583	0.486252
mmu-miR-17-3p	29867.7	36833.1	34506.5	17317	34822.9	47516.1	29607.7	14555.3	-0.253838	0.2301
mmu-miR-3066-5p	3383.88	4181.99	4184.1	1474.51	4052.22	4160.22	4221.27	1309.21	-0.253955	0.40174
mmu-miR-487b-5p	648.962	710.15	410.206	354.341	685.088	1063.37	205.915	327.302	-0.256192	0.563517
mmu-miR-3094-5p	401.739	315.622	278.94	148.594	291.527	335.803	235.332	250.289	-0.264108	0.452249
mmu-miR-26b-5p	1.48685e+06	1.92135e+06	1.7776e+06	684438	1.60812e+06	2.01291e+06	1.66284e+06	689278	-0.279975	0.163699
mmu-miR-1955-3p	1236.12	978.428	1542.37	1063.02	1894.92	1417.83	1353.16	577.591	-0.281934	0.438815
mmu-miR-134-5p	176070	207458	198852	211507	196635	232674	228934	172084	-0.294168	0.289871
mmu-miR-7227-5p	757.123	710.15	689.146	468.644	597.63	708.917	911.911	442.82	-0.295599	0.333774
mmu-miR-7087-3p	602.608	426.09	426.614	582.948	364.408	242.524	411.831	827.88	-0.297228	0.626164
mmu-miR-345-5p	2564.95	3503.4	2658.14	2308.93	2375.94	4887.79	3632.94	1232.19	-0.300803	0.319915
mmu-miR-668-3p	2225.01	3282.47	2182.3	1725.98	1749.16	1548.42	2897.53	2445.13	-0.30109	0.432519
mmu-miR-215-5p	432.642	489.214	492.247	182.885	335.256	279.835	573.622	288.795	-0.311329	0.410871
mmu-miR-193b-3p	6690.49	7906.33	6661.75	7258.27	5057.99	11137.5	7721.83	6045.45	-0.311897	0.307455
mmu-miR-22-5p	3955.58	4150.43	5463.95	4652.15	4125.1	5298.22	6677.55	3196	-0.312207	0.324514
mmu-miR-203-3p	247.224	615.463	705.555	205.746	291.527	615.638	514.789	288.795	-0.313531	0.426822
mmu-miR-431-5p	321623	430950	341357	186703	308465	351212	370971	207702	-0.317719	0.0703837
mmu-miR-148a-3p	1.11302e+06	1.77094e+06	1.2634e+06	289839	1.20933e+06	1.95333e+06	973877	295226	-0.318092	0.422294
mmu-miR-92b-3p	189806	142456	222348	252439	164348	119135	274132	236446	-0.329441	0.489249
mmu-miR-183-5p	5.74216e+06	7.9735e+06	5.63092e+06	3.93955e+06	5.43167e+06	7.66585e+06	6.13887e+06	3.73994e+06	-0.329665	0.0342589
mmu-miR-380-3p	35322.1	52030.3	33866.6	14939.5	25902.2	66526.2	32799.4	12995.8	-0.339137	0.265009
mmu-miR-30c-1-3p	16610.3	14850	16867.7	9487.19	18497.4	11380	15355.4	9626.52	-0.342578	0.213115
mmu-miR-22-3p	347179	328389	421446	280272	414172	403094	435232	166462	-0.343838	0.155196
mmu-miR-183-3p	18078.2	23750.6	16293.4	12139	15611.3	22032.4	17944.1	12341.2	-0.344254	0.092895
mmu-miR-17-5p	577376	622012	630569	264167	430818	848648	530335	263555	-0.352796	0.0884208
mmu-miR-7030-3p	200.869	315.622	344.573	205.746	437.29	205.213	250.04	134.771	-0.363477	0.382903
mmu-miR-382-5p	287583	346727	310132	281747	283568	323378	333510	246862	-0.365829	0.133319
mmu-miR-3963	150822	209652	135434	84778.9	131362	160234	138978	103138	-0.367524	0.0636421
mmu-miR-532-3p	1158.86	1104.68	886.045	1371.64	1078.65	895.473	1456.12	1039.66	-0.368602	0.388435
mmu-miR-26b-3p	3801.07	3787.46	3216.02	1988.88	3542.05	3376.68	3309.36	1906.05	-0.369066	0.145349
mmu-miR-1946b	278.127	220.935	623.513	822.985	685.088	447.737	485.372	462.073	-0.374603	0.53776
mmu-miR-193b-5p	370.836	78.9055	147.674	182.885	102.034	111.934	205.915	269.542	-0.376293	0.572173
mmu-miR-28a-3p	24227.9	31451.7	30978.8	21454.8	27811.7	26211.3	28592.8	19464.8	-0.378774	0.109592
mmu-miR-329-5p	131369	177269	132447	46235.7	115284	217302	97059.7	43511.8	-0.38095	0.215858
mmu-miR-7021-3p	262.675	331.403	360.981	480.074	378.985	652.949	308.873	231.036	-0.38117	0.385444
mmu-miR-582-3p	1746.02	2919.5	1575.19	994.44	2186.45	3339.37	1529.66	327.302	-0.382567	0.400247
mmu-miR-5106	339.933	331.403	82.0412	262.898	160.34	373.114	264.748	211.783	-0.383852	0.451642
mmu-miR-126a-3p	13257.4	17012	15308.9	5795.18	10815.6	22218.9	13090.3	4505.21	-0.38466	0.187668
mmu-miR-1960	339.933	252.498	344.573	68.5821	160.34	242.524	338.29	154.024	-0.385471	0.381366
mmu-miR-30c-2-3p	6551.43	7464.46	7055.55	4526.42	8774.96	7574.21	5750.93	2887.95	-0.385898	0.152756
mmu-miR-872-3p	6087.89	7133.06	5677.25	2423.23	4168.83	8842.8	5000.8	2502.89	-0.386403	0.155265
mmu-miR-140-5p	123736	193887	121175	30953.4	105329	206201	98633.5	34674.7	-0.393093	0.310352
mmu-miR-20a-3p	1205.22	1404.52	1164.99	811.554	451.867	2406.58	1367.87	500.579	-0.406136	0.331914
mmu-miR-487b-3p	44963.8	55833.5	51144.5	23992.3	36295.1	46881.8	50302.2	26338.1	-0.410798	0.0448583
mmu-miR-331-5p	432.642	473.433	328.165	400.062	451.867	503.704	529.497	173.277	-0.413173	0.26418
mmu-miR-200b-3p	68774.6	91262.1	63401.5	37651.6	48728.7	108744	65039.9	29110.6	-0.418057	0.0775582
mmu-miR-363-3p	196806	261903	174551	62752.6	173969	303510	133051	50731.7	-0.418759	0.227345
mmu-miR-7050-5p	355.384	504.995	590.697	365.771	378.985	783.539	382.414	250.289	-0.421135	0.224533
mmu-miR-134-3p	1606.95	1467.64	1378.29	685.821	860.004	1511.11	1426.7	847.133	-0.421802	0.160012
mmu-miR-295-5p	210851	206811	202658	113949	164392	256161	174190	98845.1	-0.42258	0.0236535
mmu-miR-7a-1-3p	23764.4	22756.3	26663.4	10493.1	18191.3	21752.5	23783.2	11705.8	-0.427855	0.0652806
mmu-miR-190a-5p	4001.94	7448.68	5742.89	822.985	3512.9	9066.67	3618.23	827.88	-0.428107	0.434827
mmu-miR-29c-3p	1684.21	3156.22	2034.62	662.96	1224.41	3917.7	1779.7	404.314	-0.429701	0.361743
mmu-miR-222-3p	48826.7	69768.2	49011.4	35697	52985	65108.4	45963.3	26357.4	-0.431097	0.036294
mmu-miR-200a-3p	98719.6	187527	97940.8	35536.9	64427.4	197862	107311	26569.2	-0.440697	0.282605
mmu-miR-380-5p	9564.47	12845.8	10402.8	4114.92	8847.84	11473.3	8221.91	4408.94	-0.445476	0.0654613
mmu-miR-363-5p	25865.8	30710	29863	15933.9	24852.7	31416.2	22768.4	14228	-0.447361	0.0254639
mmu-miR-532-5p	21415.8	30189.2	28173	10504.5	24109.3	28636.5	20106.2	9029.67	-0.448769	0.0791815
mmu-miR-291a-3p	1.23303e+06	1.63022e+06	1.6011e+06	785379	863386	2.37342e+06	1.23671e+06	531846	-0.469582	0.0745147
mmu-miR-293-5p	1.77924e+06	2.52228e+06	2.27129e+06	967922	1.6486e+06	3.08608e+06	1.72782e+06	607375	-0.47017	0.0799275
mmu-miR-19a-3p	35770.2	45607.4	43153.7	20334.6	24779.8	79697.1	29372.4	9588.01	-0.471618	0.212363
mmu-miR-219a-1-3p	2379.53	1783.26	2116.66	2388.94	1967.81	1623.05	2338.61	1867.54	-0.483119	0.229642
mmu-miR-412-5p	7555.78	8221.95	7662.65	7738.34	6675.96	6398.9	7692.41	6642.3	-0.484299	0.141732
mmu-miR-335-3p	906013	727761	1.00245e+06	423437	684155	706976	899204	395939	-0.485117	0.04232
mmu-miR-493-3p	911.638	1499.2	1345.48	891.567	1166.11	1287.24	1250.2	539.085	-0.485881	0.113712
mmu-miR-295-3p	2.60424e+07	3.19849e+07	2.71919e+07	1.14549e+07	1.81257e+07	3.52558e+07	2.04955e+07	1.17714e+07	-0.488196	0.0178843
mmu-miR-434-3p	378886	453438	402593	199837	272009	430779	329406	213073	-0.489341	0.00875807
mmu-miR-679-3p	710.768	867.961	1312.66	960.149	553.901	1082.03	1014.87	808.627	-0.496067	0.223763
mmu-miR-293-3p	4.50046e+06	6.03174e+06	5.4953e+06	2.50375e+06	3.73456e+06	6.94397e+06	4.3051e+06	1.80722e+06	-0.500895	0.0241106
mmu-miR-667-5p	3461.13	2777.47	3609.81	3280.51	3775.27	3208.78	2794.57	2117.83	-0.512134	0.130614
mmu-miR-96-5p	23192.7	38868.9	18869.5	8481.32	17331.3	45949	13369.8	5275.33	-0.512742	0.245438
mmu-miR-409-3p	1.044e+06	1.20647e+06	1.09179e+06	836278	956893	1.00578e+06	942107	696883	-0.517742	0.0165274
mmu-miR-18a-5p	58082.1	61514.7	48814.5	22072	39239.5	93409.1	33887.8	11551.8	-0.517947	0.1726
mmu-miR-433-5p	9579.92	10036.8	9828.54	5052.21	6588.51	9868.86	8898.49	4543.72	-0.517987	0.0219513
mmu-miR-382-3p	52380.5	70715.1	70867.2	34668.2	42475.5	68485.1	61598.1	27724.4	-0.518782	0.0164693
mmu-miR-21c	355.384	504.995	525.064	228.607	262.374	447.737	529.497	173.277	-0.520152	0.14118
mmu-miR-12185-3p	370.836	78.9055	360.981	377.201	451.867	93.2785	352.998	192.53	-0.521127	0.455292
mmu-miR-19b-1-5p	1684.21	1625.45	1640.82	731.542	1034.92	2798.35	1103.12	404.314	-0.521293	0.188585
mmu-miR-6992-5p	1359.73	441.871	935.27	1120.17	1253.57	391.77	1632.62	385.061	-0.523504	0.389681
mmu-miR-485-5p	3414.78	3787.46	4134.88	4274.95	3221.37	4290.81	3412.31	2984.22	-0.536608	0.117149
mmu-miR-148a-5p	24938.7	35681.1	21265.1	7544.03	22709.9	28897.7	15340.7	7797.48	-0.538268	0.106199
mmu-miR-500-3p	1158.86	3077.31	1657.23	971.579	947.462	2872.98	1235.49	866.386	-0.538367	0.155775
mmu-miR-3102-3p	648.962	852.179	278.94	834.415	524.748	820.851	514.789	519.832	-0.538447	0.267107
mmu-miR-322-3p	11604.1	14360.8	17688.1	10904.5	8046.14	8898.77	14723	12090.9	-0.539825	0.143575
mmu-miR-135b-5p	48919.4	82756.1	40512	14939.5	34064.9	100871	27416.2	7335.4	-0.545657	0.296961
mmu-miR-294-5p	91658.2	90678.2	106522	96803.6	60885.4	120049	99707.2	65710.6	-0.547031	0.0647096
mmu-miR-673-3p	5747.95	4734.33	4577.9	4446.4	5218.33	2947.6	4118.31	3792.85	-0.549441	0.141362
mmu-miR-322-5p	29991.3	35649.5	40036.1	13693.6	17899.7	32852.7	32211.1	15556.4	-0.554323	0.0358359
mmu-miR-16-2-3p	17599.2	21983.1	18689	8561.33	13556	20950.3	14222.9	7585.69	-0.558084	0.0141864
mmu-miR-370-3p	34611.3	37054	43268.5	33010.8	36572	27293.3	38594.4	23026.6	-0.5588	0.0582089
mmu-miR-20a-5p	341988	408794	383904	127197	234373	531352	247349	92780.4	-0.561956	0.0838839
mmu-miR-1193-3p	3739.26	3929.49	4577.9	3223.36	2711.2	4719.89	3706.48	2329.62	-0.563324	0.04632
mmu-miR-135b-3p	29342.4	31862	31750	18917.2	29969	28617.8	24915.8	12167.9	-0.563515	0.0180097
mmu-miR-582-5p	3275.72	5728.54	2083.85	1005.87	2375.94	5447.46	2338.61	423.567	-0.569304	0.287955
mmu-miR-410-3p	94933.9	137927	114415	54225.6	82079.4	142921	85734.4	35136.8	-0.573814	0.0232336
mmu-miR-495-3p	57155.1	61451.6	62942	78057.8	46877.5	84715.5	61627.6	42144.9	-0.587266	0.0790078
mmu-miR-28a-5p	37037.2	37243.4	41841	23340.8	28482.2	37423.3	36653	15171.4	-0.596637	0.0102154
mmu-miR-10a-5p	2348.63	1530.77	4184.1	1497.38	1880.35	3339.37	2059.15	1020.41	-0.597026	0.121553
mmu-miR-377-5p	3136.65	3803.25	2641.73	1943.16	2040.69	2761.04	2338.61	1963.81	-0.597538	0.0398992
mmu-miR-292a-3p	5.42009e+06	5.45545e+06	6.63462e+06	5.15422e+06	4.65678e+06	5.22263e+06	5.23412e+06	3.71926e+06	-0.602426	0.019151
mmu-miR-18a-3p	15297	15402.4	16736.4	14756.6	13002.1	13823.9	14723	10261.9	-0.60307	0.0374905
mmu-miR-503-5p	23718	26496.5	32537.5	15522.4	16165.2	16752.8	27107.3	16191.8	-0.606708	0.0444929
mmu-miR-130b-5p	59565.5	67779.8	65911.9	40554.9	39254.1	49512.2	48890.2	42915	-0.614828	0.0199553
mmu-miR-106a-5p	214977	265848	243252	95980.6	154524	278959	159879	79611.3	-0.615796	0.0127657
mmu-miR-181d-5p	1.44964e+06	1.78768e+06	1.72257e+06	491711	1.25521e+06	1.3725e+06	1.05263e+06	553159	-0.621921	0.0205597
mmu-miR-294-3p	8.88371e+06	1.05003e+07	1.08393e+07	9.33812e+06	7.15172e+06	1.26297e+07	8.81739e+06	5.38719e+06	-0.62366	0.0114767
mmu-miR-292a-5p	1.36011e+07	1.39361e+07	1.74821e+07	1.13786e+07	1.30364e+07	1.03785e+07	1.27933e+07	8.23288e+06	-0.648551	0.0132197
mmu-miR-539-5p	11156	13287.7	11157.6	8607.05	7987.83	12443.4	9427.99	5949.19	-0.649324	0.0073066
mmu-miR-154-3p	126069	126643	121880	57883.3	71030.5	168330	90235.1	33769.8	-0.650794	0.027622
mmu-miR-323-5p	1915.98	1578.11	1903.36	1931.73	1647.13	1697.67	1529.66	1174.43	-0.651545	0.0721455
mmu-miR-92a-3p	2.27699e+06	2.24407e+06	2.69223e+06	1.953e+06	2.12048e+06	2.04591e+06	1.87538e+06	1.30809e+06	-0.653871	0.00863251
mmu-miR-27a-3p	32772.6	39815.7	47305	13636.4	19911.3	51657.6	27504.4	10184.9	-0.658099	0.0547095
mmu-miR-19b-3p	469154	638140	698745	239111	324149	815758	397711	151233	-0.66147	0.0399819
mmu-miR-668-5p	169.966	236.717	360.981	400.062	247.798	167.901	176.499	308.048	-0.66259	0.261339
mmu-miR-12191-3p	169.966	410.309	443.023	148.594	189.492	298.491	338.29	96.2652	-0.663876	0.119286
mmu-miR-421-3p	22636.4	30583.8	21806.6	11601.8	15800.8	20577.2	16032	12264.2	-0.665649	0.00551059
mmu-miR-146b-3p	293.578	536.557	377.39	160.025	408.138	466.392	73.5412	115.518	-0.672645	0.212554
mmu-miR-6944-3p	448.093	741.712	820.412	331.48	349.832	559.671	691.288	231.036	-0.67285	0.0703896
mmu-miR-25-5p	19515.2	18463.9	25662.5	23672.2	17039.7	14215.6	20135.6	16788.6	-0.674021	0.0798734
mmu-miR-300-3p	325238	468636	312889	137301	260086	377218	234773	99210.9	-0.674108	0.014396
mmu-miR-1947-3p	216.321	142.03	311.757	274.328	189.492	93.2785	352.998	134.771	-0.679223	0.231229
mmu-miR-1197-5p	726.22	473.433	410.206	422.923	524.748	578.327	176.499	308.048	-0.697519	0.131777
mmu-miR-758-3p	127444	140404	115055	61038	88784.5	135384	74644.4	45302.4	-0.698448	0.00356674
mmu-miR-323-3p	353561	453533	413537	235214	271164	295805	287090	215730	-0.69954	0.00229951
mmu-miR-300-5p	3059.39	3945.28	3133.97	1485.94	1924.08	4160.22	1941.49	1097.42	-0.699974	0.0286519
mmu-miR-200b-5p	4017.39	4907.92	2920.67	2217.49	1996.96	2574.49	3191.69	2310.36	-0.70348	0.0346342
mmu-miR-130b-3p	340195	497531	329740	86447.7	216838	408578	214402	96611.7	-0.709478	0.0476264
mmu-miR-1258-3p	1653.31	1877.95	951.678	697.251	1093.23	1511.11	1073.7	365.808	-0.711495	0.0547386
mmu-miR-20b-3p	2024.14	2335.6	1952.58	1154.46	1370.18	3525.93	808.954	519.832	-0.71372	0.103056
mmu-miR-200a-5p	6443.27	8947.88	5152.19	2103.18	4693.58	5634.02	4456.6	1867.54	-0.714465	0.0303145
mmu-miR-32-3p	68187.4	89194.8	73361.3	17008.4	52533.1	73130.3	44757.2	15152.1	-0.715959	0.0617769
mmu-miR-540-3p	44484.8	44471.1	55623.9	43161	37548.7	30912.5	46154.5	28070.9	-0.717043	0.0254307
mmu-miR-20b-5p	513855	630613	555091	175056	379218	580435	313389	144744	-0.717917	0.0182237
mmu-miR-370-5p	13566.4	15197.2	12125.7	7646.9	8658.35	10484.5	8486.66	7373.91	-0.722862	0.00568792
mmu-miR-30b-3p	16455.8	21004.6	13848.6	10504.5	15684.1	13805.2	10987.1	6199.48	-0.724103	0.00871154
mmu-miR-665-3p	19113.5	21525.4	19148.4	15636.7	13395.7	25073.3	15796.7	7008.1	-0.728468	0.00898122
mmu-miR-221-3p	141922	205644	152252	115378	110707	165681	116592	74027.9	-0.73605	0.00125495
mmu-miR-712-3p	262.675	347.184	82.0412	228.607	160.34	149.246	176.499	173.277	-0.742321	0.160698
mmu-miR-379-3p	106723	124387	116072	69245	64048.4	123557	81748.4	46996.6	-0.746839	0.00132789
mmu-miR-181c-3p	63134.8	104518	69472.5	24575.2	54894.5	85592.3	41462.6	14555.3	-0.748517	0.0450112
mmu-miR-496a-3p	13211	15102.5	13093.8	10047.3	8891.57	12984.4	9957.48	6680.8	-0.754589	0.00282886
mmu-miR-1193-5p	2055.05	2225.14	2822.22	1908.87	1515.94	1193.96	2191.53	1501.74	-0.756426	0.0555101
mmu-miR-679-5p	24135.2	25170.9	27500.2	20929	20654.7	20502.6	19753.2	12225.7	-0.763456	0.00537443
mmu-miR-26a-2-3p	13303.7	16964.7	11042.7	10344.5	11194.6	15092.5	7839.5	5140.56	-0.777684	0.00811071
mmu-miR-362-5p	757.123	552.339	492.247	400.062	233.221	1026.06	338.29	192.53	-0.779168	0.0937352
mmu-miR-376b-3p	72173.9	86448.9	71261	29284.5	39676.8	99957.2	43448.2	15556.4	-0.780219	0.0297236
mmu-miR-3071-3p	4171.9	4702.77	3888.75	1211.62	1996.96	5167.63	2426.86	866.386	-0.782258	0.0564957
mmu-miR-106a-3p	803.477	1073.11	1214.21	1417.36	714.241	1249.93	970.744	616.097	-0.801969	0.0596448
mmu-miR-3061-3p	1606.95	1641.23	1394.7	1325.92	1166.11	1156.65	1191.37	789.374	-0.805314	0.0183899
mmu-miR-149-5p	2564.95	2335.6	3281.65	3417.67	1822.04	2126.75	2456.28	2079.33	-0.806491	0.0604553
mmu-miR-10b-3p	1467.89	2446.07	1476.74	400.062	1282.72	1119.34	1058.99	404.314	-0.809478	0.0587548
mmu-miR-21a-5p	531825	606168	894889	302813	385238	586069	547088	178168	-0.809537	0.0071973
mmu-miR-130a-5p	3862.87	4087.31	3265.24	1886.01	2273.91	4029.63	2382.74	1001.16	-0.811623	0.0117027
mmu-miR-18b-3p	4156.45	3503.4	4627.12	8732.78	4970.53	4328.12	3485.86	3773.59	-0.814496	0.122904
mmu-miR-3965	2101.4	2019.98	2904.26	1017.3	1297.29	2276	1867.95	500.579	-0.818054	0.0317832
mmu-miR-23a-5p	525.351	220.935	492.247	411.492	306.103	298.491	205.915	327.302	-0.828582	0.108465
mmu-miR-30d-3p	9023.67	12325	6399.22	1325.92	6836.3	7313.03	4765.47	904.892	-0.837567	0.138809
mmu-miR-329-3p	9579.92	10999.4	9648.05	27501.4	10830.2	18357.2	11354.8	8529.09	-0.837731	0.132483
mmu-miR-434-5p	105518	127322	101239	37125.8	73770.9	111188	61289.3	18540.7	-0.842682	0.0224263
mmu-miR-127-3p	3.76037e+06	4.33e+06	4.02581e+06	3.43684e+06	2.58132e+06	3.17471e+06	3.0305e+06	2.09702e+06	-0.846862	0.00126286
mmu-miR-872-5p	113831	172251	117926	31753.5	88114	131467	65790	17943.8	-0.851607	0.0545598
mmu-miR-362-3p	1390.63	2635.44	918.862	560.087	1049.5	2070.78	661.871	173.277	-0.863493	0.122252
mmu-miR-674-5p	15250.6	16380.8	19132	14790.9	10757.3	12200.8	13516.9	8779.38	-0.86852	0.00517991
mmu-miR-376a-3p	1761.47	5618.07	1115.76	697.251	1034.92	4906.45	676.579	154.024	-0.871482	0.276946
mmu-miR-674-3p	7184.94	8821.64	8958.9	6389.56	4081.38	6342.94	6398.09	4389.69	-0.872395	0.00514689
mmu-miR-500-5p	185.418	647.025	229.715	171.455	247.798	242.524	220.624	96.2652	-0.873942	0.0542907
mmu-miR-181c-5p	298600	561255	277693	97032.2	182977	437047	165718	64690.2	-0.875138	0.0435325
mmu-miR-335-5p	62408.6	65680.9	83009.3	51905.2	35070.7	57011.8	63245.5	28725.5	-0.875196	0.00292706
mmu-miR-369-3p	319707	466205	442596	95900.6	198996	401956	232346	71794.6	-0.877187	0.027402
mmu-miR-290a-3p	28662.5	19205.6	27254.1	24963.9	21704.2	19234	16193.8	13169.1	-0.877437	0.0138624
mmu-miR-410-5p	4249.16	4308.24	3757.49	2960.46	2813.23	4402.74	2544.53	1270.7	-0.879039	0.00606092
mmu-miR-1197-3p	11156	13587.5	8942.49	4057.77	6763.42	10727	5883.3	2387.38	-0.8888	0.0101126
mmu-miR-503-3p	741.671	1136.24	1755.68	1234.48	685.088	802.195	1147.24	693.109	-0.890151	0.0473439
mmu-miR-381-3p	46972.5	73319	43350.6	17019.8	31499.5	64250.2	20871	8336.56	-0.901719	0.0398909
mmu-miR-376a-5p	17305.7	26922.6	23874	7818.36	10261.7	22760	12693.2	5005.79	-0.923465	0.00781767
mmu-miR-540-5p	4063.74	6249.32	2690.95	1348.78	1676.28	6305.63	1588.49	519.832	-0.935084	0.0953781
mmu-miR-3078-3p	293.578	394.528	443.023	491.505	364.408	111.934	220.624	308.048	-0.941832	0.116921
mmu-miR-494-3p	13628.2	16175.6	15735.5	11190.3	6865.46	17480.4	8957.32	5660.39	-0.946242	0.00274668
mmu-miR-495-5p	726.22	678.587	443.023	902.997	408.138	858.162	558.913	250.289	-0.946925	0.0480292
mmu-miR-9-5p	33838.8	43287.6	40052.5	13202	20713	40389.6	17399.9	7913	-0.947502	0.00888062
mmu-miR-3086-5p	726.22	883.742	656.33	377.201	626.783	335.803	441.247	231.036	-0.949192	0.0192484
mmu-miR-145a-3p	896.186	962.647	1017.31	525.796	553.901	1063.37	544.205	192.53	-0.952955	0.0173211
mmu-miR-18b-5p	33622.4	55486.4	27270.5	7509.74	22753.7	42908.1	11693.1	3523.3	-0.967558	0.0940169
mmu-miR-1936	216.321	268.279	639.922	228.607	291.527	223.868	117.666	173.277	-1.0033	0.0568314
mmu-miR-12180-3p	12283.9	10368.2	9205.03	11041.7	7914.95	7760.77	5839.17	5583.38	-1.01659	0.00654362
mmu-miR-376c-3p	28647.1	37448.6	27155.6	15282.4	14590.9	31285.6	15531.9	7662.71	-1.02281	0.00124895
mmu-miR-136-3p	7432.17	13303.5	5201.41	1554.53	3483.75	10783	2647.48	558.338	-1.04503	0.116845
mmu-miR-6540-5p	648.962	457.652	705.555	514.365	204.069	223.868	573.622	346.555	-1.05663	0.0463942
mmu-miR-6390	111081	76522.6	86602.7	59940.7	73377.3	69473.8	40815.4	23989.3	-1.06458	0.00270362
mmu-miR-92a-2-5p	10105.3	5807.45	11288.9	5818.04	6865.46	1940.19	4647.81	4582.22	-1.06761	0.0422306
mmu-miR-96-3p	9023.67	8553.36	6054.64	2411.8	4708.16	6100.41	3118.15	1212.94	-1.11724	0.00959156
mmu-miR-1198-3p	432.642	536.557	672.738	194.316	306.103	167.901	308.873	173.277	-1.13134	0.0145063
mmu-miR-142a-5p	28477.1	51951.4	25153.8	14562.3	13701.8	35035.4	15473.1	6064.7	-1.14658	0.00497563
mmu-miR-381-5p	1297.92	1041.55	1247.03	731.542	714.241	1417.83	338.29	211.783	-1.1545	0.0209177
mmu-miR-494-5p	3677.45	3440.28	3872.35	3634.85	2084.42	2369.27	1985.61	1771.28	-1.17433	0.00297921
mmu-miR-543-5p	1220.67	1357.17	771.187	2423.23	743.393	1082.03	941.328	808.627	-1.17673	0.0426459
mmu-miR-7a-2-3p	741.671	347.184	656.33	445.783	262.374	130.59	294.165	365.808	-1.22482	0.0420537
mmu-miR-182-3p	46818	38521.7	61809.9	31582	23978.1	16976.7	36314.7	14670.8	-1.26238	0.00202024
mmu-miR-27a-5p	7988.42	8442.89	8105.67	3154.77	5670.2	6175.04	1956.2	904.892	-1.28466	0.0128928
mmu-miR-210-5p	1406.09	5334.01	721.963	262.898	1180.68	1697.67	338.29	308.048	-1.32778	0.0922048
mmu-miR-6399	339.933	504.995	393.798	240.037	174.916	167.901	132.374	154.024	-1.43999	0.00165644
mmu-miR-210-3p	58499.3	263781	45270.3	30839.1	33846.3	97438.7	19826.7	16230.3	-1.5367	0.0230585
mmu-miR-375-3p	355.384	142.03	475.839	308.619	131.187	93.2785	176.499	115.518	-1.63616	0.00813049
mmu-miR-142a-3p	2024.14	4387.15	2674.54	640.099	816.275	2667.76	352.998	115.518	-1.7226	0.028708
mmu-miR-452-5p	1081.6	2067.32	1394.7	502.935	583.054	652.949	294.165	96.2652	-1.96406	0.00130428
