# Supplementary material for: Repressing Ago2 mRNA translation by Trim71 maintains pluripotency through inhibiting let-7 microRNAs
Source: eLife. 2021 Feb 18;10:e66288. doi: 10.7554/eLife.66288 (PMC7906602; doi:10.7554/eLife.66288)
Supplement: Supplementary file 3. [file elife-66288-supp3.xlsx]

## Sheet: Plasmids
	Plasmids used in this study.
	Name	Description	Backbone	used primers	Source	Identifier
	pWH290	Luciferase reporter with 5 BoxB sites in the 3'UTR	pGL4.13		(1)
	pWH 291	Luciferase reporter without 5 BoxB sites in the 3'UTR	pGL4.13		(1)
	pWH294	lambdaN-GFP plasmid	pCDNA3.1/Myc-His A		(1)
	pWH363	HCV-IRES bicistronic luciferase reporter			(1)
	pWH364	CrPV-IRES bicistronic luciferase reporter			(1)
	pWH313	pBI-CMV1 vector			Clontech	Cat# 631630
	pWH492	pBI-CMV1 vector with FLuc-5BoxB	pWH313		This study
	pWH493	pBI-CMV1 vector with FLuc-His6	pWH313		This study
	pWH569	FLuc-5BoxB-MALAT1 reporter			(2)
	pWH570	FLuc-3His-V5-MALAT1 reporter			(2)
	pWH497	pCDNA3.1 with Lambda peptide-EcoRV-V5-Stop-bGHpA			This study
	pWH814	FLAG-Trim71 expression plasmid	pCDNA3.1		(3)
	pWH815	lambdaN-FLAG-Trim71 plasmid	pCDNA3.1/Myc-His A	oWH3531,oWH3532	This study
	pWH123	pRetroX-IRES-DsRedExpress Vector			Clontech	Cat# 632521
	pWH252	Super PiggyBac Transposase Expression Vector			System Biosciences	Cat# PB210PA-1
	pWH253	PB-CMV-MCS-EF1-GFP-T2A-Puro cDNA			System Biosciences	Cat# PB510B-1
	pWH406	PB-CMV- TRE-2A-GFP-bGHpA- Ubc-rtTA3-IRES-PuroR	pWH253		This study
	pWH826	FLAG-mouse Trim71	pWH406	oWH3819, oWH3820	This study
	pWH831	FLAG-Trim71 C12AC15A	pWH406	oWH3803, oWH3804	This study
	pWH840	FLAG-Trim71 R738A	pWH406	oWH3881, oWH3882	This study
	pWH979	pMXS-hs-3xHA-Trim71			Addgene	Cat# 52717
	pWH983	3xHA-human Trim71	pWH979	oWH4226, oWH4279
	pWH958	pCW57.1 _3xHA-Ago2			Addgene	Cat# 73538
	pWH957	DsRed-Ago2	pWH406	oWH3124,oWH4220, oWH2512,oWH4221	This study
	pWH974	pGL-p21UTR			Addgene	Cat# 20014
	pWH975	pGL-p21UTRm1&2			Addgene	Cat# 20880
	pWH231	pRL-SV40			Promega	Cat# E223A
	pWH985	pRL-SV40- p21UTRm1&2	pWH231		This study
	pWH719	pmirGLO vector			Promega	Cat# E1330
	pWH930	pmirGLO with two binding sites of mouse miR-290a-5p	pWH719	oWH3955, oWH4134	This study
	pWH933	pmirGLO with two binding sites of mouse miR-291a-3p	pWH719	oWH4046, oWH4138	This study
	pWH931	pmirGLO with two binding sites of artificial siRNA	pWH719	oWH4001, oWH4136	This study
	pWH464	pSpCas9(BB)-2A-GFP (pX458)			Addgene	Cat# 48138
	pWH464-3373	pSpCas9(BB)-2A-GFP with sgRNA for N-terminus KI of mouse Trim71	pWH464	oWH3373, oWH3374	This study
	pWH464-3871	pSpCas9(BB)-2A-GFP with sgRNA1 for knocking out the Trim71 CLIP-tag in the 3’UTR of Ago2	pWH464	oWH3871, oWH3872	This study
	pWH464-3873	pSpCas9(BB)-2A-GFP with sgRNA2 for knocking out the Trim71 CLIP-tag in the 3’UTR of Ago2	pWH464	oWH3873, oWH3874	This study
	pWH464-4130	pSpCas9(BB)-2A-GFP with dual sgRNAs for KO mouse Ago2	pWH464	oWH4130, oWH4131	This study
	pWH464-4241	pSpCas9(BB)-2A-GFP with dual sgRNAs for KO mouse Dgcr8	pWH464	oWH4241, oWH4242	This study
	pWH464-4370	pSpCas9(BB)-2A-GFP with dual sgRNAs for KO mouse Dicer	pWH464	oWH4370, oWH4371	This study
	pWH1081	V5-Lin28a	pWH406	oWH4868	This study
	pWH1082	V5-Lin28b	pWH406	oWH4869	This study
	1. Hu W, Yuan B, Lodish H F. Cpeb4-mediated translational regulatory circuitry controls terminal erythroid differentiation[J]. Developmental cell, 2014, 30(6): 660-672.
	2. Zhang X, Chen X, Liu Q, et al. Translation repression via modulation of the cytoplasmic poly (A)-binding protein in the inflammatory response[J]. Elife, 2017, 6: e27786.
	3. Chen J, Lai F, Niswander L. The ubiquitin ligase mLin41 temporally promotes neural progenitor cell maintenance through FGF signaling[J]. Genes & development, 2012, 26(8): 803-815.

## Sheet: Oligos for CRISPR
	Oligos used for sgRNA CRISPR/Cas9 system in this study
	Name	Orientation	Sequence	Description	Source
	oWH3373	Forward	CACCgCCCTCCAGCCCGCCTGCAAA	sgRNA for N-terminus knocking in of mouse Trim71	This study
	oWH3374	Reverse	AAACTTTGCAGGCGGGCTGGAGGGc
	oWH3375		CGCGCCCTCATCCTCCTCGCCGCGCGCCCTCTGCCCTCCAGCCCGCCTGCATGGACTACAAAGACCATGACGGTGATTATAAAGATCATGACATCGATTACAAGGATGACGATGACAAGCAAATCGCTTCGTTCCCGGAGACCGACTTCCAGATCTGCCTGCTGTGCAAGGAGAT	ss donor DNA for N terminal terminal 3xFLAG-mouse Trim71	This study
				3xFLAG-mouse Trim71
	oWH3871	Forward	CACCgCCTCACACCCACCCGCTTGC	sgRNA1 for knocking out the Trim71 CLIP-tag in the 3’UTR of Ago2	This study
	oWH3872	Reverse	AAACGCAAGCGGGTGGGTGTGAGGc
	oWH3873	Forward	CACCg TCTTTCTATCAAGCGCCGCT	sgRNA2 for knocking out the Trim71 CLIP-tag in the 3’UTR of Ago2	This study
	oWH3874	Reverse	AAACAGCGGCGCTTGATAGAAAGAc
	oWH4130	Forward	CTTGTGGAAAGGACGAAACACCGGGGTTCCAATACCAGCGGTGTTTTAGAGCTAGAAATAGC	Dual sgRNAs for knocking out mouse Ago2	This study
	oWH4131	Reverse	ACTTGCTATTTCTAGCTCTAAAACGGATCGGGTAACCAAGGATCAGAGACGTCCGTCTCCGGT
	oWH4241	Forward	CTTGTGGAAAGGACGAAACACCACATCAATCTGAGTAGAGACGTTTTAGAGCTAGAAATAGC	Dual sgRNAs for knocking out mouse Dgcr8	This study
	oWH4242	Reverse	ACTTGCTATTTCTAGCTCTAAAACCTCAATGGGGACTGAGCATGAGAGACGTCCGTCTCCGGT
	oWH4370	Forward	CTTGTGGAAAGGACGAAACACCtgccatgcgtgagaggatacGTTTTAGAGCTAGAAATAGC	Dual sgRNAs for knocking out mouse Dicer	(1)
	oWH4371	Reverse	ACTTGCTATTTCTAGCTCTAAAACCGCCTGTAGGTTTAAACTCCAGAGACGTCCGTCTCCGGT

## Sheet: Oligos for genotyping
	Oligos used for genotyping
	Name	Orientation	Sequence	Description	Source
	oWH3376	Forward	GCGTCCTCGATGCGCTCTGCTGA	Genotyping primers for N-terminus tagging of mouse Trim71	This study
	oWH3377	Reverse	AAGTCTGCGAGGACGACGACGAGGC
	oWH3875	Forward	TCAGGGGCTGTTGGGTTTTGGCTTC	Genotyping primers for knocking out Trim71 CLIP-tag	This study
	oWH3869	Reverse	ATCAGCTTAGTCAAACCAGAGCAGGAGAGA
	oWH4171	Forward	AAGCCTGATGTGTTCCCTGTAAGTC	Genotyping primers for knocking out mouse Ago2	This study
	oWH4173	Reverse	TTTCATGCCAGGGTTACCTACAAGT
	oWH4243	Forward	CCAAAACTCAGATGGTAACTAACCTGCCAA	Genotyping primers for knocking out mouse Dgcr8	This study
	oWH4244	Reverse	GGAGAAGGGAAAGATCCTCAGTAGAAAGTT
	oWH4373	Forward	TCTACCCACCTGAGGACACC	Genotyping primers for knocking out mouse Dicer	(1)
	oWH4374	Reverse	CACCAGCAAACCACTCACTG
	oWH4377	Forward	CTGCTGGGGAGTAAGACTGC
	oWH4378	Reverse	GAGGTGCCTTTCGTTTAGGA
	1. Bodak M, Cirera-Salinas D, Yu J, et al. Dicer, a new regulator of pluripotency exit and LINE-1 elements in mouse embryonic stem cells[J]. FEBS Open Bio, 2017, 7(2): 204-220.

## Sheet: Oligos used for cloning
	Oligos used for cloning
	Name	Orientation	Sequence	Description	Source
	oWH3819	Forward	ggtcgccaccgttATGGACTACAAAGACGATGACGATAAAATCGAT	Amplification of Flag-mouseTrim71 for cloning from pWH814 into pWH406	This study
	oWH3820	Reverse	GCCCTCTCCACTGCCGTTgaagatgaggattcgattgttgccaaagtc
	oWH3803	Forward	CTTCCAGATCgccCTGCTGgccAAGGAGATGTG	Point mutants C12A and C15A in mouse Trim71	This study
	oWH3804	Reverse	TCGGTCTCCGGGAACGAA
	oWH3881	Forward	CGACTCTCCAgccGGCGTGGCTTTC	Point mutant R738A in mouse Trim71	This study
	oWH3882	Reverse	AAGTGCTTCCAGAGAGATC
	oWH3531	Forward	tccaagcttgaattctGATGCCTCCTTCCCAGAAACCGATTTCCA	Amplification of mouse Trim71 for cloning from pWH814 into pWH497	This study
	oWH3532	Reverse	gggataggcttaccGATGAAAATGAGAATGCGGTTGTTCCCGAAGTC
	oWH4226	Forward	CCGGTCGCCACCGTTATGTACCCATACGATGTTCCTGACTATGCG	Amplification of 3xHA-human Trim71 for cloning from pWH979 into pWH406	This study
	oWH4279	Reverse	agctctaggaattcttactt TTAGAAGACGAGGATTCGATTGTTGCCAAA
	oWH3124	Forward	CCGGTCGCCACCGTTATGGCCTCCTCCGAGGACGTCATCAAGG	Amplification of DsRed for cloning from pWH123 into pWH406	This study
	oWH4220	Reverse	GGCTCCCGAGTACATCAGGAACAGGTGGTGGCGGCCCTC
	oWH2512	Forward	ATGTACTCGGGAGCCGGCCCCGTTCT	Amplification of mouse Ago2 CDS for cloning from pWH958 into DsRed-pWH406	This study
	oWH4221	Reverse	agctctaggaattcttacttTCAAGCAAAGTACATGGTGCGCAGTGTGTC
	oWH4283	Forward	AGTTCTCAAAAATGAACAATAATTTCTAGAGTGCCCACGGGAGCCCCGC	Amplification of mouse p21UTRm1&2 for cloning from pWH975 into pWH231	This study
	oWH4284	Reverse	AGCGGCCGCTTCTAGATGCATGCTCGAGCGGCCGCC
	oWH4046	Forward	CTAGGCACACAAAGTGGAAGCACTTTAATTAAGCACACAAAGTGGAAGCACTTT	Amplification of 2 bindings sites of mouse miR-291a-3p for cloning into pWH719	This study
	oWH4138	Reverse	GGCCAAAGTGCTTCCACTTTGTGTGCTTAATTAAAGTGCTTCCACTTTGTGTGC
	oWH3955	Forward	CTAGAAAGTGCCCCCATAGTTTGAGTAATTAAAAAGTGCCCCCATAGTTTGAGT	Amplification of 2 bindings sites of mouse miR-290a-5p for cloning into pWH719	This study
	oWH4134	Reverse	GGCCACTCAAACTATGGGGGCACTTTTTAATTACTCAAACTATGGGGGCACTTT
	oWH4001	Forward	CTAGTTGGTGCTCTTCATCTTGTTGAATTAATTGGTGCTCTTCATCTTGTTG	Amplification of 2 binding sites of an artificial siRNA for cloning into pWH719	This study
	oWH4136	Reverse	GGCCCAACAAGATGAAGAGCACCAATTAATTCAACAAGATGAAGAGCACCAA
	oWH4868		gtcgccaccgttATGggtaagcctatccctaaccctctcctcggtctcgattctacg ggctcggtgtccaaccagcagtttgcaggtggctgcgccaaggcagcggagaaggcgccagaggaggcgccgcctgacgcggcccgagcggcagacgagccgcagctgctgcacggggccggcatctgtaagtggttcaacgtgcgcatggggttcggcttcctgtctatgaccgcccgcgctggggtcgcgctcgaccccccggtggacgtctttgtgcaccagagcaagctgcacatggaagggttccgaagcctcaaggagggtgaggcggtggagttcacctttaagaagtctgccaagggtctggaatccatccgtgtcactggccctggtggtgt…	gblock of V5-Lin28a (mouse) for cloning into pWH406	This study
	oWH4869		gtcgccaccgttATGggtaagcctatccctaaccctctcctcggtctcgattctacg atggccgaaggcggggcaagcaaaggtgaagagccagaaaaactgcccgggctggcagaggacgaaccccaggttctgcatggcactggccactgtaaatggttcaacgtgcgcatgggattcggattcatctccatgataagtcgagagggaaatcccttggatattccagtggatgtatttgtacaccaaagcaaactattcatggaaggatttagaagcttgaaagaaggagagccagtggaatttacatttaaaaaatcccccaaaggccttgagtcaatacgggtaacaggcccaggtgggagcccctgcttaggaagtgaaagaagacctaaagg…	gblock of V5-Lin28b (mouse) for cloning into pWH406	This study

## Sheet: Oligos used for mRNAs qPCR
	Oligos used for mRNAs qPCR
	Name	Orientation	Sequence	Description	Source
	oWH3844	Forward	GGCGTTACACGATGCACTTTC	qPCR mouse Ago2	This study
	oWH3845	Reverse	CACCCAGAGGGTTGGAACAG
	oWH1432	Forward	CCTGGTGATGTCCGACCTG	qPCR mouse Cdkn1a (p21)	This study
	oWH1433	Reverse	CCATGAGCGCATCGCAATC
	oWH170	Forward	GCAAAGTGGAGATTGTTGCCAT	qPCR mouse GAPDH	This study
	oWH171	Reverse	CCTTGACTGTGCCGTTGAATTT
	oWH145	Forward	GTAACCCGTTGAACCCCATT	qPCR mouse 18S	This study
	oWH146	Reverse	CCATCCAATCGGTAGTAGCG

## Sheet: Oligos used for miRNAs qPCR
	Oligos used for miRNAs qPCR
	Name	Orientation	Sequence	Description	Source
	oWH4121	RT primer	CACCGTTCCCCGCCGDUCGGTG AAAGTG	RT primer for quantifying mouse miR-290a-5p	This study
	oWH4122	Forward	CCCGCCACTCAAACTATGGGG	qPCR mouse miR-290a-5p	This study
	oWH4123	Reverse	GCCGTCGGTGAAAGTGCCC
	oWH4124	RT primer	CACCGTTCCCCGCCGDUCGGTG ACACTA	RT primer for quantifying mm-miR-293-3p	This study
	oWH4125	Forward	CCCGCCAGTGCCGCAGAGTTT	qPCR mm-miR-293-3p	This study
	oWH4126	Reverse	GCCGTCGGTGACACTACAA
	oWH3899	RT primer	AACGCTTCACGAATTTGCGT	RT primer for quantifying mouse U6 snRNA	This study
	oWH3900	Forward	CTCGCTTCGGCAGCACA	qPCR mouse U6 snRNA	This study
	oWH3901	Reverse	AACGCTTCACGAATTTGCGT
	oWH4792		TGAGGTAGTAGGTTGTATAGTT	qPCR mouse mmu-let-7a	This study
	oWH4793		TGAGGTAGTAGGTTGTGTGGTT	qPCR mouse mmu-let-7b	This study
	oWH4794		TGAGGTAGTAGGTTGTATGGTT	qPCR mouse mmu-let-7c	This study
	oWH4795		AGAGGTAGTAGGTTGCATAGTT	qPCR mouse mmu-let-7d	This study
	oWH4796		TGAGGTAGGAGGTTGTATAGTT	qPCR mouse mmu-let-7e	This study
	oWH4797		TGAGGTAGTAGATTGTATAGTT	qPCR mouse mmu-let-7f	This study
	oWH4798		TGAGGTAGTAGTTTGTACAGTT	qPCR mouse mmu-let-7g	This study
	oWH4799		TGAGGTAGTAGTTTGTGCTGTT	qPCR mouse mmu-let-7i	This study
	oWH4800		TGAGGTAGTAAGTTGTATTGTT	qPCR mouse mmu-mir-98	This study
	oWH4801		ACTCAAACTATGGGGGCACTTT	qPCR mouse mmu-miR-290a	This study
	oWH4802		AGTGCCGCAGAGTTTGTAGTGT	qPCR mouse mmu-miR-293	This study
	oWH4820		TTTGGCAATGGTAGAACTCACACCG	qPCR mouse mmu-miR-182-5p	This study
	oWH4821		TATGGCACTGGTAGAATTCACT	qPCR mouse mmu-miR-183-5p	This study
	oWH4872		TGTAAACATCCTCGACTGGAAG	qPCR mouse mmu-miR-30a-5p	This study
	oWH4873		TAGCAGCACGTAAATATTGGCG	qPCR mouse mmu-miR-16-5p	This study
	oWH4824	Forward	atggggtggagaagatggtgaag	qPCR mouse pri-let-7g	This study
	oWH4825	Reverse	tcaaacggtttatctgaacaactcca
	oWH4828	Forward	GATCCCCGGCCATTGTCCTCC	qPCR mouse pri-let-7i	This study
	oWH4829	Reverse	TCCGCCGGCTCCCACACCAT
	oWH4830	Forward	TAGTTGAGGAAGACACCCGAGGA	qPCR mouse pri-let-7e	This study
	oWH4831	Reverse	TGTGAACAGAGAAGACACCCCAG
	oWH4834	Forward	ACCCAAGGCAGAAAGGAAACGTA	qPCR mouse pri-let-7d	This study
	oWH4835	Reverse	TGCCAAGTAGAAGACCAGCAAGA
	oWH4852	Forward	atccaactagccctgttcaagttcc	qPCR mouse pri-let-7f-2 and pri-miR-98	This study
	oWH4853	Reverse	actgccaccaggtgttctaatgaag
	oWH5242		TTAGGGCAGAGATTTTGCCCACA	qPCR mouse pre-let-7d	This study
	oWH5243		GAGGAAGACACCCGAGGAGATCA	qPCR mouse pre-let-7e	This study
	oWH5246		TGAGGGTCTATGATACCACCCGG	qPCR mouse pre-let-7g	This study
	oWH5247		GGTCGGGTTGTGACATTGCCCGCT	qPCR mouse pre-let-7i	This study
	oWH5248		GTGGGGTAGGGATTTTAGGCCCCA	qPCR mouse pre-miR-98	This study
